# Supplementary material for: Proteomic characteristics reveal the signatures and the risks of T1 colorectal cancer metastasis to lymph nodes
Source: eLife journal article supplement (doi:10.7554/elife.82959), 2023-05-09
Supplement: supp [file Figure1-source data1.xlsx]

## Sheet: Sheet1
Figure1-source data1: Clinicopathologic Features
Symbol	Sur/Er	Lymph Node Metastasi	N stage	Invasion Depth	Lymphatic Vascular invasion	Differentiation	Histological Type	Tumor Size (cm)	Tumor Location	Gender	Age (Years)	CEA	Tumor purity (%)	MMR IHC	MSI	Gene mutations			Invasion Depth: 0. <1000um; 1. >=1000um
Exp062470	2	NO	N0	1	NO	Poorly	Colon Mucinous Adenocarcinoma	1.5	Left Colon	Male	53	0	90	MLH1(+),MSH2(+),MSH6(+),PMS2(+)	pMMR/MSS	untested		Invasion Depth: 0. <1000um; 1. >=1000um	CEA: 0. <5 ng/L; 1. >=5ng/L
Exp062497	2	NO	N0	1	NO	Well-moderately	Rectal Adenocarcinoma	2	Rectal	Male	46	1	80	MLH1(+),MSH2(+),MSH6(+),PMS2(+)	pMMR/MSS	KRAS-exon2 mutation		CEA: 0. <5 ng/L; 1. >=5ng/L
Exp062500	2	NO	N0	1	NO	Well-moderately	Colon Adenocarcinoma	7	Right Colon	Female	37	0	85	MLH1(+),MSH2(+),MSH6(+),PMS2(+)	pMMR/MSS	untested
Exp062502	2	NO	N0	1	NO	Well-moderately	Colon Adenocarcinoma	1.5	Right Colon	Female	82	0	85	MLH1(+),MSH2(+),MSH6(+),PMS2(+)	pMMR/MSS	untested
Exp062504	2	NO	N0	1	NO	Poorly	Rectal Adenocarcinoma	3.5	Rectal	Female	51	0	85	MLH1(+),MSH2(+),MSH6(+),PMS2(+)	pMMR/MSS	untested
Exp062505	2	NO	N0	0	NO	Poorly	Colon Adenocarcinoma	4	Right Colon	Female	62	0	90	MLH1(+),MSH2(+),MSH6(+),PMS2(+)	pMMR/MSS	untested
Exp062506	2	NO	N0	1	NO	Poorly	Colon Adenocarcinoma	2.2	Right Colon	Female	66	0	95	MLH1(-),MSH2(+),MSH6(+),PMS1(-),PMS2(-)	dMMR/MSI-H	K-RAS-exon2 mution
Exp062507	2	NO	N0	1	NO	Well-moderately	Rectal Adenocarcinoma	3	Rectal	Male	39	0	95	MLH1(+),MSH2(+),MSH6(+),PMS2(+)	pMMR/MSS	RAS/BRAF/PIK3CA wild
Exp062509	2	NO	N0	1	NO	Well-moderately	Colon Adenocarcinoma	1.8	Right Colon	Male	61	0	95	MLH1(+),MSH2(+),MSH6(+),PMS2(+)	pMMR/MSS	untested
Exp062512	2	NO	N0	1	NO	Poorly	Colon Adenocarcinoma	2.5	Right Colon	Male	69	0	85	MLH1(+),MSH2(+),MSH6(+),PMS2(+)	pMMR/MSS	KRAS-exon2 mutation
Exp062514	2	NO	N0	1	YES	Poorly	Rectal Adenocarcinoma	2	Rectal	Male	69	0	90	MLH1(+),MSH2(+),MSH6(+),PMS2(+)	pMMR/MSS	KRAS-exon2 mutation
Exp062515	2	NO	N0	1	NO	Well-moderately	Rectal Adenocarcinoma	2.5	Rectal	Male	63	0	90	MLH1(+),MSH2(+),MSH6(+),PMS2(+)	pMMR/MSS	KRAS-exon2 mutation
Exp062516	2	NO	N0	1	NO	Well-moderately	Rectal Adenocarcinoma	2	Rectal	Male	58	1	90	MLH1(+),MSH2(+),MSH6(+),PMS2(+)	pMMR/MSS	RAS/BRAF/PIK3CA wild
Exp062517	2	NO	N0	1	NO	Well-moderately	Colon Adenocarcinoma	2.5	Right Colon	Male	69	0	90	MLH1(+),MSH2(+),MSH6(+),PMS2(+)	pMMR/MSS	KRAS-exon2 mutation
Exp062518	2	NO	N0	1	NO	Well-moderately	Colon Adenocarcinoma	2	Left Colon	Female	64	0	85	MLH1(+),MSH2(+),MSH6(+),PMS2(+)	pMMR/MSS	KRAS-exon2 mutation
Exp062520	2	NO	N0	0	NO	Well-moderately	Colon Adenocarcinoma	3	Right Colon	Female	58	0	80	untested	NA	KRAS-exon2 mutation
Exp062521	2	NO	N0	1	NO	Well-moderately	Rectal Adenocarcinoma	3	Rectal	Female	54	0	95	untested	NA	untested
Exp062523	2	NO	N0	1	NO	Well-moderately	Colon Adenocarcinoma	1.5	Left Colon	Female	66	0	90	untested	NA	untested
Exp062525	2	NO	N0	1	NO	Well-moderately	Rectal Adenocarcinoma	2.8	Rectal	Male	70	0	90	MLH1(+),MSH2(+),MSH6(+),PMS2(+)	pMMR/MSS	KRAS-exon2 mutation
Exp062526	2	NO	N0	0	NO	Well-moderately	Rectal Adenocarcinoma	1.5	Rectal	Male	69	0	85	MLH1(+),MSH2(+),MSH6(+),PMS2(+)	pMMR/MSS	RAS/BRAF/PIK3CA wild
Exp062527	2	NO	N0	1	NO	Poorly	Rectal Adenocarcinoma	2	Rectal	Female	52	0	90	MLH1(+),MSH2(+),MSH6(+),PMS2(+)	pMMR/MSS	RAS/BRAF/PIK3CA wild
Exp062533	2	NO	N0	0	NO	Well-moderately	Rectal Adenocarcinoma	1.1	Rectal	Male	57	0	85	MLH1(+),MSH2(+),MSH6(+),PMS2(+)	pMMR/MSS	RAS/BRAF/PIK3CA wild
Exp062535	2	NO	N0	0	NO	Well-moderately	Rectal Adenocarcinoma	9	Rectal	Female	66	0	90	MLH1(+),MSH2(+),MSH6(+),PMS2(+)	pMMR/MSS	untested
Exp062536	2	NO	N0	0	NO	Well-moderately	Rectal Adenocarcinoma	1	Rectal	Female	33	0	85	MLH1(-),MSH2(+),MSH6(+),PMS2(-)	dMMR/MSI-H	NRAS mutation
Exp062539	2	NO	N0	0	NO	Well-moderately	Colon Adenocarcinoma	7	Right Colon	Female	52	0	80	MLH1(+),MSH2(+),MSH6(+),PMS2(+)	pMMR/MSS	untested
Exp062540	2	NO	N0	0	NO	Well-moderately	Colon Adenocarcinoma	4.5	Right Colon	Female	71	0	90	MLH1(+),MSH2(+),MSH6(+),PMS2(+)	pMMR/MSS	KRAS-exon2 mutation
Exp062542	2	NO	N0	1	NO	Well-moderately	Colon Adenocarcinoma	4	Right Colon	Male	66	0	95	MLH1(+),MSH2(+),MSH6(+),PMS2(+)	pMMR/MSS	KRAS-exon2 mutation
Exp062543	2	NO	N0	1	NO	Poorly	Rectal Adenocarcinoma	3	Rectal	Female	67	0	85	MLH1(+),MSH2(+),MSH6(+),PMS2(+)	pMMR/MSS	KRAS-exon3 mutation
Exp062544	2	NO	N0	1	NO	Well-moderately	Rectal Adenocarcinoma	4	Rectal	Female	54	0	90	MLH1(-),MSH2(+),MSH6(+),PMS1(+),PMS2(-)	dMMR/MSI-H	RAS/BRAF/PIK3CA wild
Exp062548	2	NO	N0	1	NO	Poorly	Colon Mucinous Adenocarcinoma	1.3	Right Colon	Male	58	0	90	MLH1(+),MSH2(-),MSH6(-),PMS1(+),PMS2(+)	dMMR/MSI-H	KRAS-exon2 mutation
Exp062551	2	NO	N0	0	NO	Well-moderately	Colon Adenocarcinoma	1.5	Left Colon	Male	68	0	85	MLH1(+),MSH2(+),MSH6(+),PMS2(+)	pMMR/MSS	untested
Exp062552	2	NO	N0	1	NO	Well-moderately	Colon Adenocarcinoma	1.5	Left Colon	Female	68	0	90	MLH1(+),MSH2(+),MSH6(+),PMS2(+)	pMMR/MSS	RAS/BRAF/PIK3CA wild
Exp062553	2	NO	N0	1	NO	Well-moderately	Colon Adenocarcinoma	5	Right Colon	Male	40	0	85	MLH1(+),MSH2(+),MSH6(+),PMS2(+)	pMMR/MSS	KRAS-exon2 mutation
Exp062554	2	NO	N0	1	NO	Poorly	Rectal Adenocarcinoma	2	Rectal	Female	44	0	80	MLH1(+),MSH2(+),MSH6(+),PMS2(+)	pMMR/MSS	RAS/BRAF/PIK3CA wild
Exp062557	2	NO	N0	1	NO	Well-moderately	Colon Adenocarcinoma	2	Left Colon	Female	69	0	85	MLH1(+),MSH2(+),MSH6(+),PMS2(+)	pMMR/MSS	RAS/BRAF/PIK3CA wild
Exp062559	2	NO	N0	1	NO	Well-moderately	Rectal Adenocarcinoma	2.5	Rectal	Male	60	0	80	MLH1(+),MSH2(+),MSH6(+),PMS2(+)	pMMR/MSS	RAS/BRAF/PIK3CA wild
Exp062560	2	NO	N0	1	NO	Poorly	Rectal Adenocarcinoma	2	Rectal	Male	65	0	85	MLH1(+),MSH2(+),MSH6(+),PMS2(+)	pMMR/MSS	RAS/BRAF/PIK3CA wild
Exp062561	2	NO	N0	1	NO	Well-moderately	Rectal Adenocarcinoma	1.8	Rectal	Female	77	0	85	MLH1(+),MSH2(+),MSH6(+),PMS2(+)	pMMR/MSS	RAS/BRAF/PIK3CA wild
Exp062563	2	NO	N0	1	NO	Well-moderately	Rectal Adenocarcinoma	1.8	Rectal	Female	50	0	85	MLH1(+),MSH2(-),MSH6(+),PMS2(+)	dMMR/MSI-H	PIK3CA mutation
Exp062566	2	NO	N0	0	NO	Poorly	Rectal Adenocarcinoma	1	Rectal	Female	61	0	90	MLH1(+),MSH2(+),MSH6(+),PMS2(+)	pMMR/MSS	RAS/BRAF/PIK3CA wild
Exp062572	2	NO	N0	0	NO	Well-moderately	Colon Adenocarcinoma	1	Right Colon	Male	70	0	90	MLH1(+),MSH2(+),MSH6(+),PMS2(+)	pMMR/MSS	KRAS-exon2 mutation
Exp062573	2	NO	N0	1	NO	Poorly	RectalMucinous Adenocarcinoma	2.5	Rectal	Male	71	1	85	MLH1(+),MSH2(+),MSH6(+),PMS2(+)	pMMR/MSS	RAS/BRAF/PIK3CA wild
Exp062574	2	NO	N0	0	NO	Poorly	Colon Mucinous Adenocarcinoma	5.5	Right Colon	Male	57	0	95	MLH1(+),MSH2(+),MSH6(+),PMS2(+)	pMMR/MSS	KRAS-exon2 mutation
Exp062575	2	NO	N0	0	NO	Poorly	Colon Mucinous Adenocarcinoma	1.5	Right Colon	Male	67	0	90	MLH1(+),MSH2(+),MSH6(+),PMS2(+)	pMMR/MSS	KRAS-exon2 mutation
Exp062577	2	NO	N0	0	NO	Well-moderately	Colon Adenocarcinoma	6.5	Right Colon	Male	81	0	90	untested	NA	untested
Exp062578	2	NO	N0	1	NO	Well-moderately	Rectal Adenocarcinoma	2	Rectal	Male	65	0	90	MLH1(+),MSH2(+),MSH6(+),PMS1(+),PMS2(-)	dMMR/MSI-H	untested
Exp062579	2	NO	N0	1	NO	Well-moderately	Colon Adenocarcinoma	3.5	Left Colon	Male	78	0	95	MLH1(+),MSH2(+),MSH6(+),PMS2(+)	pMMR/MSS	untested
Exp062580	2	NO	N0	0	NO	Poorly	RectalMucinous Adenocarcinoma	2	Rectal	Male	70	0	90	MLH1(+),MSH2(+),MSH6(+),PMS2(+)	pMMR/MSS	RAS/BRAF/PIK3CA wild
Exp062581	2	NO	N0	0	NO	Poorly	RectalMucinous Adenocarcinoma	3	Rectal	Male	65	0	85	MLH1(+),MSH2(+),MSH6(+),PMS2(+)	pMMR/MSS	KRAS-exon2 mutation
Exp062583	2	NO	N0	0	NO	Poorly	Colon Mucinous Adenocarcinoma	1.5	Left Colon	Female	73	0	85	MLH1(+),MSH2(+),MSH6(+),PMS2(+)	pMMR/MSS	KRAS-exon2 mutation
Exp062586	2	NO	N0	1	NO	Poorly	Colon Adenocarcinoma	2.4	Right Colon	Female	64	0	85	MLH1(-),MSH2(+),MSH6(+),PMS1(+),PMS2(-)	dMMR/MSI-H	RAS/BRAF/PIK3CA wild
Exp062587	2	NO	N0	1	NO	Poorly	Rectal Adenocarcinoma	2.2	Rectal	Female	71	0	90	MLH1(+),MSH2(+),MSH6(+),PMS2(+)	pMMR/MSS	untested
Exp062589	2	NO	N0	0	NO	Well-moderately	Colon Adenocarcinoma	1	Left Colon	Male	81	0	90	MLH1(+),MSH2(+),MSH6(+),PMS2(+)	pMMR/MSS	KRAS-exon2 mutation
Exp062595	2	NO	N0	1	NO	Well-moderately	Rectal Adenocarcinoma	2.5	Rectal	Female	64	0	80	MLH1(+),MSH2(+),MSH6(+),PMS2(+)	pMMR/MSS	KRAS-exon2 mutation
Exp062601	2	NO	N0	1	NO	Well-moderately	Colon Adenocarcinoma	6	Left Colon	Male	41	1	80	MLH1(+),MSH2(+),MSH6(+),PMS2(+)	pMMR/MSS	KRAS-exon2 mutation
Exp062605	2	NO	N0	0	NO	Well-moderately	Colon Adenocarcinoma	1.5	Right Colon	Female	81	0	90	MLH1(+),MSH2(+),MSH6(+),PMS2(+)	pMMR/MSS	RAS/BRAF/PIK3CA wild
Exp062620	2	NO	N0	0	NO	Well-moderately	Colon Adenocarcinoma	2	Right Colon	Male	72	0	95	MLH1(+),MSH2(+),MSH6(+),PMS2(+)	pMMR/MSS	RAS/BRAF/PIK3CA wild
Exp062621	2	NO	N0	1	YES	Well-moderately	Colon Adenocarcinoma	2	Right Colon	Female	83	0	85	MLH1(-),MSH2(+),MSH6(+),PMS1(+),PMS2(-)	dMMR/MSI-H	untested
Exp062623	2	NO	N0	1	NO	Well-moderately	Rectal Adenocarcinoma	3	Rectal	Female	47	0	90	MLH1(+),MSH2(+),MSH6(+),PMS2(+)	pMMR/MSS	RAS/BRAF/PIK3CA wild
Exp062624	2	NO	N0	1	NO	Poorly	Rectal Adenocarcinoma	2.2	Rectal	Male	59	0	95	MLH1(+),MSH2(+),MSH6(+),PMS2(+)	pMMR/MSS	RAS/BRAF/PIK3CA wild
Exp062626	2	NO	N0	1	NO	Poorly	Rectal Adenocarcinoma	2.5	Rectal	Male	31	0	80	MLH1(+),MSH2(+),MSH6(+),PMS2(+)	pMMR/MSS	RAS/BRAF/PIK3CA wild
Exp062634	2	NO	N0	1	NO	Well-moderately	Colon Adenocarcinoma	1.2	Left Colon	Female	48	0	90	MLH1(+),MSH2(+),MSH6(+),PMS2(+)	pMMR/MSS	RAS/BRAF/PIK3CA wild
Exp062636	2	NO	N0	0	NO	Poorly	Colon Mucinous Adenocarcinoma	1	Left Colon	Male	55	0	90	MLH1(+),MSH2(+),MSH6(+),PMS2(+)	pMMR/MSS	KRAS-exon2 mutation
Exp062637	2	NO	N0	1	NO	Poorly	RectalMucinous Adenocarcinoma	3.5	Rectal	Male	71	0	85	MLH1(+),MSH2(+),MSH6(+),PMS2(+)	pMMR/MSS	KRAS-exon2 mutation
Exp062638	2	NO	N0	0	NO	Poorly	RectalMucinous Adenocarcinoma	4	Rectal	Male	49	0	85	MLH1(+),MSH2(+),MSH6(+),PMS2(+)	pMMR/MSS	KRAS-exon2 mutation
Exp062639	2	NO	N0	1	NO	Poorly	RectalMucinous Adenocarcinoma	2.5	Rectal	Female	70	0	80	MLH1(+),MSH2(+),MSH6(+),PMS2(+)	pMMR/MSS	KRAS-exon2 mutation
Exp062640	2	NO	N0	0	NO	Poorly	RectalMucinous Adenocarcinoma	5	Rectal	Female	55	0	90	MLH1(+),MSH2(+),MSH6(+),PMS2(+)	pMMR/MSS	KRAS-exon2 mutation
Exp062641	2	NO	N0	1	NO	Poorly	Colon Mucinous Adenocarcinoma	6.3	Right Colon	Female	53	1	95	MLH1(+),MSH2(+),MSH6(+),PMS2(+)	pMMR/MSS	K-RAS-exon2 mutation, NRAS mutation, PIK3CA mutation
Exp062642	2	NO	N0	0	NO	Poorly	RectalMucinous Adenocarcinoma	2	Rectal	Female	63	0	85	MLH1(+),MSH2(+),MSH6(+),PMS2(+)	pMMR/MSS	KRAS-exon2 mutation
Exp062643	2	NO	N0	1	NO	Poorly	RectalMucinous Adenocarcinoma	1.5	Rectal	Male	60	0	95	MLH1(+),MSH2(+),MSH6(+),PMS2(+)	pMMR/MSS	untested
Exp062482	2	YES	N2	1	YES	Well-moderately	Rectal Adenocarcinoma	3	Rectal	Female	44	0	90	MLH1(+),MSH2(+),MSH6(+),PMS2(+)	pMMR/MSS	KRAS-exon2 mutation			CEA: 0. <5 ng/L; 1. >=5ng/L
Exp062503	2	YES	N2	1	NO	Well-moderately	Colon Adenocarcinoma	2.5	Right Colon	Male	44	0	80	MLH1(+),MSH2(+),MSH6(+),PMS2(+)	pMMR/MSS	untested
Exp062522	2	YES	N2	1	YES	Well-moderately	Rectal Adenocarcinoma	1.5	Rectal	Male	63	0	95	MLH1(+),MSH2(+),MSH6(+),PMS2(+)	pMMR/MSS	untested
Exp062530	2	YES	N2	1	NO	Well-moderately	Colon Adenocarcinoma	1	Left Colon	Female	49	0	85	MLH1(+),MSH2(+),MSH6(+),PMS2(+)	pMMR/MSS	RAS/BRAF/PIK3CA wild
Exp062541	2	YES	N2	1	NO	Well-moderately	Rectal Adenocarcinoma	1.1	Rectal	Female	63	0	90	MLH1(+),MSH2(+),MSH6(+),PMS2(+)	pMMR/MSS	untested
Exp062545	2	YES	N2	1	NO	Well-moderately	Rectal Adenocarcinoma	1.3	Rectal	Female	26	0	80	untested	NA	untested
Exp062549	2	YES	N2	1	YES	Poorly	Rectal Adenocarcinoma	1.3	Rectal	Male	60	0	90	MLH1(-),MSH2(+),MSH6(+),PMS1(+),PMS2(-)	dMMR/MSI-H	untested
Exp062564	2	YES	N2	1	YES	Poorly	Colon Adenocarcinoma	2.5	Left Colon	Female	33	0	85	MLH1(+),MSH2(+),MSH6(+),PMS2(+)	pMMR/MSS	RAS/BRAF/PIK3CA wild
Exp062616	2	YES	N2	1	NO	Poorly	RectalMucinous Adenocarcinoma	3	Rectal	Male	64	0	90	MLH1(+),MSH2(+),MSH6(+),PMS2(+)	pMMR/MSS	untested
Exp062618	2	YES	N2	0	NO	Well-moderately	Colon Adenocarcinoma	1	Left Colon	Female	52	0	90	MLH1(+),MSH2(+),MSH6(+),PMS2(+)	pMMR/MSS	RAS/BRAF/PIK3CA wild
Exp062625	2	YES	N2	1	YES	Poorly	Colon Adenocarcinoma	1	Left Colon	Male	79	0	80	untested	NA	untested
Exp062632	2	YES	N2	1	NO	Poorly	Rectal Adenocarcinoma	3	Rectal	Female	61	0	85	MLH1(+),MSH2(+),MSH6(+),PMS2(+)	pMMR/MSS	RAS/BRAF/PIK3CA wild
Exp062498	2	YES	N1	1	NO	Well-moderately	Rectal Adenocarcinoma	2	Rectal	Male	62	0	80	untested	NA	untested
Exp062499	2	YES	N1	1	NO	Well-moderately	Rectal Adenocarcinoma	2	Rectal	Male	79	0	85	MLH1(+),MSH2(+),MSH6(+),PMS2(+)	pMMR/MSS	RAS/BRAF/PIK3CA wild
Exp062501	2	YES	N1	1	NO	Well-moderately	Rectal Adenocarcinoma	2.5	Rectal	Female	77	0	95	MLH1(+),MSH2(+),MSH6(+),PMS2(+)	pMMR/MSS	untested
Exp062508	2	YES	N1	1	NO	Well-moderately	Rectal Adenocarcinoma	5	Rectal	Male	63	1	85	MLH1(+),MSH2(+),MSH6(+),PMS2(+)	pMMR/MSS	untested
Exp062511	2	YES	N1	1	NO	Well-moderately	Colon Adenocarcinoma	1.5	Right Colon	Male	65	0	95	MLH1(+),MSH2(+),MSH6(+),PMS2(+)	pMMR/MSS	untested
Exp062513	2	YES	N1	1	YES	Poorly	Rectal Adenocarcinoma	2	Rectal	Male	53	0	90	MLH1(+),MSH2(+),MSH6(+),PMS2(+)	pMMR/MSS	RAS/BRAF/PIK3CA wild
Exp062519	2	YES	N1	1	YES	Well-moderately	Rectal Adenocarcinoma	1	Rectal	Male	61	0	80	MLH1(+),MSH2(+),MSH6(+),PMS2(+)	pMMR/MSS	RAS/BRAF/PIK3CA wild
Exp062524	2	YES	N1	1	NO	Well-moderately	Colon Adenocarcinoma	4	Right Colon	Male	71	0	95	MLH1(+),MSH2(+),MSH6(+),PMS2(+)	pMMR/MSS	untested
Exp062528	2	YES	N1	1	YES	Well-moderately	Colon Adenocarcinoma	1.5	Left Colon	Male	65	0	90	MLH1(+),MSH2(+),MSH6(+),PMS2(+)	pMMR/MSS	untested
Exp062529	2	YES	N1	1	YES	Poorly	Colon Mucinous Adenocarcinoma	1.5	Left Colon	Male	70	1	90	MLH1(+),MSH2(+),MSH6(+),PMS2(+)	pMMR/MSS	KRAS-exon2 mutation
Exp062531	2	YES	N1	0	NO	Well-moderately	Rectal Adenocarcinoma	1.3	Rectal	Male	62	1	90	untested	NA	untested
Exp062532	2	YES	N1	1	NO	Poorly	Rectal Adenocarcinoma	1.6	Rectal	Male	63	0	90	MLH1(+),MSH2(+),MSH6(+),PMS2(+)	pMMR/MSS	untested
Exp062534	2	YES	N1	1	NO	Well-moderately	Rectal Adenocarcinoma	2.2	Rectal	Female	42	0	90	MLH1(+),MSH2(+),MSH6(+),PMS2(+)	pMMR/MSS	RAS/BRAF/PIK3CA wild
Exp062537	2	YES	N1	1	NO	Poorly	Rectal Adenocarcinoma	2	Rectal	Female	44	0	95	untested	NA	untested
Exp062538	2	YES	N1	1	NO	Well-moderately	Colon Adenocarcinoma	1	Left Colon	Male	80	0	90	MLH1(+),MSH2(+),MSH6(+),PMS2(+)	pMMR/MSS	untested
Exp062546	2	YES	N1	1	NO	Poorly	Colon Mucinous Adenocarcinoma	2	Left Colon	Female	46	1	90	MLH1(+),MSH2(+),MSH6(+),PMS2(+)	pMMR/MSS	BRAF-V600E mutation
Exp062547	2	YES	N1	1	YES	Poorly	Rectal Adenocarcinoma	3.5	Rectal	Female	75	0	90	MLH1(+),MSH2(+),MSH6(+),PMS2(+)	pMMR/MSS	KRAS-exon2 mutation
Exp062550	2	YES	N1	1	YES	Well-moderately	Rectal Adenocarcinoma	2	Rectal	Male	61	0	80	MLH1(+),MSH2(+),MSH6(+),PMS2(+)	pMMR/MSS	untested
Exp062555	2	YES	N1	0	YES	Poorly	RectalMucinous Adenocarcinoma	1	Rectal	Male	64	0	85	MLH1(+),MSH2(+),MSH6(+),PMS2(+)	pMMR/MSS	untested
Exp062556	2	YES	N1	1	YES	Well-moderately	Rectal Adenocarcinoma	6.5	Rectal	Female	72	0	85	MLH1(+),MSH2(+),MSH6(+),PMS2(+)	pMMR/MSS	BRAF-V600E mutation
Exp062558	2	YES	N1	0	NO	Poorly	Colon Mucinous Adenocarcinoma	1.8	Left Colon	Male	60	1	95	MLH1(+),MSH2(+),MSH6(+),PMS2(+)	pMMR/MSS	RAS/BRAF/PIK3CA wild
Exp062562	2	YES	N1	1	NO	Poorly	RectalMucinous Adenocarcinoma	2.2	Rectal	Female	73	0	85	MLH1(+),MSH2(+),MSH6(+),PMS2(+)	pMMR/MSS	KRAS-exon2 mutation
Exp062567	2	YES	N1	1	NO	Well-moderately	Rectal Adenocarcinoma	2	Rectal	Female	72	0	90	MLH1(+),MSH2(+),MSH6(+),PMS2(+)	pMMR/MSS	KRAS-exon2 mutation
Exp062568	2	YES	N1	1	NO	Well-moderately	Rectal Adenocarcinoma	4	Rectal	Male	47	0	95	MLH1(+),MSH2(+),MSH6(+),PMS2(+)	pMMR/MSS	RAS/BRAF/PIK3CA wild
Exp062569	2	YES	N1	1	NO	Well-moderately	Colon Adenocarcinoma	1	Right Colon	Male	81	0	95	MLH1(+),MSH2(+),MSH6(+),PMS2(+)	pMMR/MSS	RAS/BRAF/PIK3CA wild
Exp062570	2	YES	N1	1	YES	Poorly	Colon Adenocarcinoma	1.5	Left Colon	Male	69	0	90	MLH1(+),MSH2(+),MSH6(+),PMS2(+)	pMMR/MSS	KRAS-exon2 mutation
Exp062571	2	YES	N1	1	NO	Well-moderately	Colon Adenocarcinoma	1.2	Left Colon	Male	72	0	85	MLH1(+),MSH2(+),MSH6(+),PMS2(+)	pMMR/MSS	RAS/BRAF/PIK3CA wild
Exp062576	2	YES	N1	1	NO	Poorly	RectalMucinous Adenocarcinoma	2.5	Rectal	Female	65	0	85	MLH1(+),MSH2(+),MSH6(+),PMS2(+)	pMMR/MSS	KRAS-exon2 mutation
Exp062582	2	YES	N1	1	NO	Poorly	Colon Mucinous Adenocarcinoma	5	Left Colon	Male	64	0	80	MLH1(+),MSH2(+),MSH6(+),PMS2(+)	pMMR/MSS	RAS/BRAF/PIK3CA wild
Exp062584	2	YES	N1	1	NO	Poorly	RectalMucinous Adenocarcinoma	1.5	Rectal	Male	56	0	80	MLH1(+),MSH2(+),MSH6(+),PMS2(+)	pMMR/MSS	KRAS-exon2 mutation
Exp062585	2	YES	N1	1	NO	Poorly	RectalMucinous Adenocarcinoma	1	Rectal	Male	65	0	85	MLH1(+),MSH2(+),MSH6(+),PMS2(+)	pMMR/MSS	RAS/BRAF/PIK3CA wild
Exp062588	2	YES	N1	1	NO	Poorly	Rectal Adenocarcinoma	1	Rectal	Male	64	0	95	MLH1(+),MSH2(+),MSH6(+),PMS2(+)	pMMR/MSS	RAS/BRAF/PIK3CA wild
Exp062590	2	YES	N1	1	YES	Poorly	Colon Mucinous Adenocarcinoma	1.5	Left Colon	Male	72	0	95	MLH1(+),MSH2(+),MSH6(+),PMS2(+)	pMMR/MSS	RAS/BRAF/PIK3CA wild
Exp062591	2	YES	N1	1	NO	Poorly	Colon Mucinous Adenocarcinoma	2.5	Left Colon	Male	87	0	85	MLH1(+),MSH2(+),MSH6(+),PMS2(+)	pMMR/MSS	RAS/BRAF/PIK3CA wild
Exp062592	2	YES	N1	0	NO	Poorly	RectalMucinous Adenocarcinoma	2	Rectal	Female	32	0	90	MLH1(+),MSH2(+),MSH6(+),PMS2(+)	pMMR/MSS	KRAS-exon3 mutation
Exp062593	2	YES	N1	1	NO	Poorly	RectalMucinous Adenocarcinoma	2	Rectal	Male	68	0	95	MLH1(+),MSH2(+),MSH6(+),PMS2(+)	pMMR/MSS	RAS/BRAF/PIK3CA wild
Exp062596	2	YES	N1	1	YES	Poorly	Colon Mucinous Adenocarcinoma	1.7	Right Colon	Male	61	0	80	MLH1(+),MSH2(+),MSH6(+),PMS2(+)	pMMR/MSS	RAS/BRAF/PIK3CA wild
Exp062599	2	YES	N1	1	YES	Poorly	RectalMucinous Adenocarcinoma	2	Rectal	Male	61	0	90	MLH1(+),MSH2(+),MSH6(+),PMS2(+)	pMMR/MSS	RAS/BRAF/PIK3CA wild
Exp062600	2	YES	N1	1	NO	Well-moderately	Colon Adenocarcinoma	2.5	Right Colon	Female	56	0	90	untested	NA	untested
Exp062604	2	YES	N1	1	YES	Well-moderately	Rectal Adenocarcinoma	8	Rectal	Male	41	0	95	MLH1(+),MSH2(+),MSH6(+),PMS2(+)	pMMR/MSS	KRAS-exon2 mutation
Exp062607	2	YES	N1	1	NO	Poorly	RectalMucinous Adenocarcinoma	1.5	Rectal	Female	62	0	80	MLH1(+),MSH2(+),MSH6(+),PMS2(+)	pMMR/MSS	KRAS-exon2 mutation
Exp062611	2	YES	N1	0	NO	Well-moderately	Rectal Adenocarcinoma	1	Rectal	Female	69	0	90	MLH1(+),MSH2(+),MSH6(+),PMS2(+)	pMMR/MSS	KRAS-exon2 mutation
Exp062612	2	YES	N1	1	NO	Well-moderately	Rectal Adenocarcinoma	6	Rectal	Female	75	0	80	untested	NA	untested
Exp062613	2	YES	N1	1	NO	Well-moderately	Rectal Adenocarcinoma	2	Rectal	Male	66	0	80	untested	NA	untested
Exp062614	2	YES	N1	0	NO	Well-moderately	Rectal Adenocarcinoma	1.5	Rectal	Female	66	0	85	MLH1(+),MSH2(+),MSH6(+),PMS2(+)	pMMR/MSS	untested
Exp062615	2	YES	N1	1	NO	Well-moderately	Rectal Adenocarcinoma	5	Rectal	Female	60	0	90	untested	NA	untested
Exp062627	2	YES	N1	1	NO	Poorly	Colon Adenocarcinoma	2.5	Right Colon	Female	61	1	90	MLH1(+),MSH2(+),MSH6(+),PMS2(+)	pMMR/MSS	untested
Exp062629	2	YES	N1	1	NO	Poorly	RectalMucinous Adenocarcinoma	3	Rectal	Male	71	0	80	MLH1(+),MSH2(+),MSH6(+),PMS2(+)	pMMR/MSS	KRAS-exon2 mutation
Exp062633	2	YES	N1	1	YES	Well-moderately	Rectal Adenocarcinoma	1.5	Rectal	Female	65	0	80	MLH1(+),MSH2(+),MSH6(+),PMS2(+)	pMMR/MSS	untested
Exp081065	2	YES	N1	1	NO	Well-moderately	Colon Adenocarcinoma	2	Left Colon	Female	44	0	95	MLH1(+),MSH2(+),MSH6(+),PMS2(+)	pMMR/MSS	untested
Exp062466	1	NO	N0	1	NO	Poorly	Colon Adenocarcinoma	1.2	Right Colon	Male	70	0	95	untested	NA	untested
Exp062467	1	NO	N0	0	NO	Well-moderately	Rectal Adenocarcinoma	2.5	Rectal	Male	59	0	90	untested	NA	untested
Exp062468	1	NO	N0	1	NO	Well-moderately	Rectal Adenocarcinoma	2.5	Rectal	Male	63	0	90	untested	NA	untested
Exp062469	1	NO	N0	1	YES	Well-moderately	Rectal Adenocarcinoma	1.2	Rectal	Female	77	0	85	untested	NA	untested
Exp062475	1	NO	N0	1	YES	Well-moderately	Colon Adenocarcinoma	3.5	Right Colon	Male	73	0	85	MLH1(+),MSH2(+),MSH6(+),PMS2(+)	pMMR/MSS	untested
Exp062476	1	NO	N0	1	NO	Well-moderately	Colon Adenocarcinoma	1.2	Left Colon	Male	72	0	95	untested	NA	untested
Exp062477	1	NO	N0	1	NO	Well-moderately	Colon Adenocarcinoma	2	Right Colon	Female	57	0	80	untested	NA	untested
Exp062479	1	NO	N0	1	NO	Well-moderately	Colon Adenocarcinoma	2.5	Left Colon	Female	72	1	85	untested	NA	untested
Exp062480	1	NO	N0	1	NO	Well-moderately	Colon Adenocarcinoma	2	Left Colon	Male	54	0	85	MLH1(+),MSH2(+),MSH6(+),PMS2(+)	pMMR/MSS	untested
Exp062481	1	NO	N0	1	NO	Well-moderately	Rectal Adenocarcinoma	2	Rectal	Male	60	0	95	MLH1(+),MSH2(+),MSH6(+),PMS2(+)	pMMR/MSS	untested
Exp062483	1	NO	N0	1	NO	Poorly	Colon Adenocarcinoma	1	Left Colon	Male	72	1	85	untested	NA	untested
Exp062484	1	NO	N0	0	YES	Well-moderately	Colon Adenocarcinoma	3.5	Left Colon	Female	51	0	85	MLH1(+),MSH2(+),MSH6(+),PMS2(+)	pMMR/MSS	untested
Exp062485	1	NO	N0	1	NO	Well-moderately	Colon Adenocarcinoma	2	Right Colon	Female	67	0	95	untested	NA	untested
Exp062486	1	NO	N0	0	NO	Well-moderately	Colon Adenocarcinoma	2.5	Right Colon	Male	65	0	80	MLH1(+),MSH2(+),MSH6(+),PMS2(+)	pMMR/MSS	untested
Exp062487	1	NO	N0	1	NO	Well-moderately	Rectal Adenocarcinoma	1	Rectal	Male	51	0	90	untested	NA	untested
Exp062489	1	NO	N0	1	YES	Well-moderately	Rectal Adenocarcinoma	2.5	Rectal	Female	47	0	90	untested	NA	untested
Exp062492	1	NO	N0	1	YES	Well-moderately	Colon Adenocarcinoma	1.5	Left Colon	Female	64	0	85	MLH1(+),MSH2(+),MSH6(+),PMS2(+)	pMMR/MSS	untested
Exp062494	1	NO	N0	1	NO	Well-moderately	Colon Adenocarcinoma	4	Right Colon	Male	47	0	95	MLH1(+),MSH2(+),MSH6(+),PMS2(+)	pMMR/MSS	KRAS-exon2 mutation
Exp062495	1	NO	N0	1	YES	Well-moderately	Rectal Adenocarcinoma	3	Rectal	Female	61	0	90	untested	NA	untested
Exp062496	1	NO	N0	1	NO	Well-moderately	Colon Adenocarcinoma	1	Left Colon	Female	56	0	80	MLH1(+),MSH2(+),MSH6(+),PMS2(+)	pMMR/MSS	RAS/BRAF/PIK3CA wild
Exp062510	1	NO	N0	1	NO	Well-moderately	Rectal Adenocarcinoma	1.2	Rectal	Male	52	0	90	untested	NA	untested
Exp062594	1	NO	N0	1	NO	Well-moderately	Colon Adenocarcinoma	1	Right Colon	Female	67	0	85	untested	NA	untested
Exp062598	1	NO	N0	1	NO	Well-moderately	Colon Adenocarcinoma	1.8	Left Colon	Male	70	1	85	untested	NA	untested
Exp062603	1	NO	N0	1	NO	Well-moderately	Rectal Adenocarcinoma	1	Rectal	Female	50	0	95	untested	NA	untested
Exp062606	1	NO	N0	1	NO	Well-moderately	Rectal Adenocarcinoma	2.5	Rectal	Male	59	1	90	untested	NA	untested
Exp062608	1	NO	N0	1	NO	Well-moderately	Colon Adenocarcinoma	2	Left Colon	Female	66	0	90	untested	NA	untested
Exp062609	1	NO	N0	1	NO	Well-moderately	Colon Adenocarcinoma	1.2	Right Colon	Female	72	0	80	untested	NA	untested
Exp062610	1	NO	N0	1	NO	Well-moderately	Colon Adenocarcinoma	2.2	Right Colon	Female	74	0	90	untested	NA	untested
Exp062622	1	NO	N0	1	NO	Well-moderately	Colon Adenocarcinoma	1.5	Left Colon	Male	63	0	95	untested	NA	untested
Exp062630	1	NO	N0	1	NO	Well-moderately	Rectal Adenocarcinoma	2	Rectal	Male	76	0	85	untested	NA	untested
Exp081062	1	NO	N0	0	NO	Well-moderately	Colon Adenocarcinoma	2.5	Left Colon	Male	31	0	85	untested	NA	untested
Exp081063	1	NO	N0	1	NO	Well-moderately	Colon Adenocarcinoma	3	Left Colon	Female	35	0	90	untested	NA	untested
Exp081066	1	NO	N0	0	NO	Well-moderately	Rectal Adenocarcinoma	1.8	Rectal	Male	67	0	95	untested	NA	untested
Exp081068	1	NO	N0	1	NO	Well-moderately	Rectal Adenocarcinoma	2.5	Rectal	Male	47	0	85	untested	NA	untested
Exp081313	1	NO	N0	1	NO	Well-moderately	Colon Adenocarcinoma	1.5	Left Colon	Male	73	0	85	untested	NA	untested
Exp062602	1	YES	N2	1	YES	Poorly	RectalMucinous Adenocarcinoma	1.5	Rectal	Female	69	0	90	MLH1(+),MSH2(+),MSH6(+),PMS2(+)	pMMR/MSS	RAS/BRAF/PIK3CA wild
Exp062471	1	YES	N1	1	NO	Poorly	Colon Mucinous Adenocarcinoma	1	Right Colon	Female	74	0	90	MLH1(-),PMS2(-),MSH2(+),MSH6(+)	dMMR/MSI-H	untested
Exp062474	1	YES	N1	1	NO	Well-moderately	Colon Adenocarcinoma	1.8	Left Colon	Male	84	0	85	untested	NA	untested
Exp062488	1	YES	N1	1	NO	Well-moderately	Colon Adenocarcinoma	1.5	Left Colon	Male	65	0	85	untested	NA	untested
Exp062597	1	YES	N1	1	YES	Poorly	Colon Adenocarcinoma	3	Left Colon	Male	61	0	90	MLH1(+),MSH2(+),MSH6(+),PMS2(+)	pMMR/MSS	RAS/BRAF/PIK3CA wild
Exp062617	1	YES	N1	0	NO	Well-moderately	Rectal Adenocarcinoma	2.5	Rectal	Male	58	0	80	untested	NA	untested
Exp062631	1	YES	N1	1	NO	Well-moderately	Colon Adenocarcinoma	2	Right Colon	Male	58	0	95	MLH1(+),MSH2(+),MSH6(+),PMS2(+)	pMMR/MSS	untested
Exp062651	2	NO	N0	1	NO	Well-moderately	Colon Adenocarcinoma	2	Right Colon	Male	71	0	90	MLH1(+),MSH2(+),MSH6(+),PMS2(+)	pMMR/MSS	RAS/BRAF/PIK3CA wild
Exp062655	2	NO	N0	1	NO	Well-moderately	Rectal Adenocarcinoma	1.5	Rectal	Male	48	0	95	MLH1(+),MSH2(+),MSH6(+),PMS2(+)	pMMR/MSS	RAS/BRAF/PIK3CA wild
Exp062657	2	NO	N0	1	NO	Well-moderately	Colon Adenocarcinoma	1.3	Right Colon	Male	70	0	90	MLH1(+),MSH2(+),MSH6(+),PMS2(+)	pMMR/MSS	RAS/BRAF/PIK3CA wild
Exp062658	2	NO	N0	1	NO	Well-moderately	Colon Adenocarcinoma	1.5	Right Colon	Female	81	0	80	MLH1(+),MSH2(+),MSH6(+),PMS2(+)	pMMR/MSS	KRAS-exon3 mutation
Exp062659	2	NO	N0	1	NO	Well-moderately	Colon Adenocarcinoma	3	Right Colon	Female	51	0	85	MLH1(+),MSH2(+),MSH6(+),PMS2(+)	pMMR/MSS	RAS/BRAF/PIK3CA wild
Exp062663	2	NO	N0	1	NO	Well-moderately	Rectal Adenocarcinoma	1	Rectal	Male	76	0	95	MLH1(+),MSH2(+),MSH6(+),PMS2(+)	pMMR/MSS	RAS/BRAF/PIK3CA wild
Exp081019	2	NO	N0	1	NO	Poorly	RectalMucinous Adenocarcinoma	2.5	Rectal	Female	56	0	85	MLH1(+),MSH2(+),MSH6(+),PMS2(+)	pMMR/MSS	BRAF-V600E mutation
Exp081021	2	NO	N0	1	NO	Well-moderately	Rectal Adenocarcinoma	1.5	Rectal	Male	61	0	85	MLH1(+),MSH2(+),MSH6(+),PMS2(+)	pMMR/MSS	RAS/BRAF/PIK3CA wild
Exp081023	2	NO	N0	1	NO	Poorly	Rectal Adenocarcinoma	1	Rectal	Male	84	0	90	MLH1(+),MSH2(+),MSH6(+),PMS2(+)	pMMR/MSS	KRAS-exon2 mutation
Exp081025	2	NO	N0	1	NO	Well-moderately	Rectal Adenocarcinoma	2	Rectal	Male	75	1	85	MLH1(+),MSH2(+),MSH6(+),PMS2(+)	pMMR/MSS	RAS/BRAF/PIK3CA wild
Exp081026	2	NO	N0	1	NO	Poorly	Colon Adenocarcinoma	1	Right Colon	Male	62	0	85	MLH1(-),MSH2(+),MSH6(+),PMS2(-)	dMMR/MSI-H	RAS/BRAF/PIK3CA wild
Exp081027	2	NO	N0	1	YES	Well-moderately	Colon Adenocarcinoma	2.5	Right Colon	Male	63	0	90	MLH1(+),MSH2(+),MSH6(+),PMS2(+)	pMMR/MSS	RAS/BRAF/PIK3CA wild
Exp081028	2	NO	N0	1	NO	Well-moderately	Rectal Adenocarcinoma	4	Rectal	Male	65	0	80	MLH1(+),MSH2(+),MSH6(+),PMS2(+)	pMMR/MSS	KRAS-exon3 mutation
Exp081031	2	NO	N0	1	NO	Well-moderately	Rectal Adenocarcinoma	1	Rectal	Male	46	0	85	MLH1(+),MSH2(+),MSH6(+),PMS2(+)	pMMR/MSS	KRAS-exon2 mutation
Exp081032	2	NO	N0	1	NO	Well-moderately	Rectal Adenocarcinoma	1.5	Rectal	Male	44	0	90	MLH1(+),MSH2(+),MSH6(+),PMS2(+)	pMMR/MSS	KRAS-exon2 mutation
Exp081033	2	NO	N0	0	NO	Well-moderately	Rectal Adenocarcinoma	1	Rectal	Female	62	0	90	MLH1(+),MSH2(+),MSH6(+),PMS2(+)	pMMR/MSS	RAS/BRAF/PIK3CA wild
Exp081034	2	NO	N0	1	NO	Well-moderately	Rectal Adenocarcinoma	1	Rectal	Male	70	1	90	MLH1(+),MSH2(+),MSH6(+),PMS2(+)	pMMR/MSS	KRAS-exon4 mutation
Exp081035	2	NO	N0	1	NO	Poorly	Colon Mucinous Adenocarcinoma	3.5	Right Colon	Male	62	0	95	MLH1(+),MSH2(+),MSH6(+),PMS2(+)	pMMR/MSS	PIK3CA mutation
Exp081036	2	NO	N0	1	NO	Well-moderately	Rectal Adenocarcinoma	2	Rectal	Male	67	0	85	MLH1(+),MSH2(+),MSH6(+),PMS2(+)	pMMR/MSS	RAS/BRAF/PIK3CA wild
Exp081038	2	NO	N0	0	NO	Well-moderately	Rectal Adenocarcinoma	2	Rectal	Female	66	0	90	MLH1(+),MSH2(+),MSH6(+),PMS2(+)	pMMR/MSS	KRAS-exon2 mutation
Exp081039	2	NO	N0	1	NO	Well-moderately	Rectal Adenocarcinoma	1.2	Rectal	Female	53	0	95	MLH1(+),MSH2(+),MSH6(+),PMS2(+)	pMMR/MSS	RAS/BRAF/PIK3CA wild
Exp081040	2	NO	N0	1	YES	Well-moderately	Colon Adenocarcinoma	3	Left Colon	Male	59	0	95	MLH1(+),MSH2(+),MSH6(+),PMS2(+)	pMMR/MSS	RAS/BRAF/PIK3CA wild
Exp081042	2	NO	N0	1	NO	Well-moderately	Rectal Adenocarcinoma	4	Rectal	Male	58	0	90	MLH1(+),MSH2(-),MSH6(-),PMS2(+)	dMMR/MSI-H	RAS/BRAF/PIK3CA wild
Exp081043	2	NO	N0	0	NO	Well-moderately	Rectal Adenocarcinoma	2.5	Rectal	Male	76	0	95	MLH1(+),MSH2(+),MSH6(+),PMS2(+)	pMMR/MSS	RAS/BRAF/PIK3CA wild
Exp081046	2	NO	N0	0	NO	Well-moderately	Rectal Adenocarcinoma	4.8	Rectal	Female	66	0	80	MLH1(+),MSH2(+),MSH6(+),PMS2(+)	pMMR/MSS	RAS/BRAF/PIK3CA wild
Exp081049	2	NO	N0	1	NO	Well-moderately	Colon Adenocarcinoma	1.5	Left Colon	Male	63	0	90	MLH1(+),MSH2(+),MSH6(+),PMS2(+)	pMMR/MSS	RAS/BRAF/PIK3CA wild
Exp081054	2	NO	N0	1	YES	Well-moderately	Colon Adenocarcinoma	1.5	Left Colon	Female	84	0	90	MLH1(+),MSH2(+),MSH6(+),PMS2(+)	pMMR/MSS	KRAS-exon2 mutation
Exp081055	2	NO	N0	1	YES	Well-moderately	Rectal Adenocarcinoma	1.2	Rectal	Female	51	0	95	MLH1(+),MSH2(+),MSH6(+),PMS2(+)	pMMR/MSS	RAS/BRAF/PIK3CA wild
Exp081059	2	NO	N0	1	NO	Well-moderately	Colon Adenocarcinoma	2	Left Colon	Male	69	0	90	MLH1(+),MSH2(+),MSH6(+),PMS2(+)	pMMR/MSS	RAS/BRAF/PIK3CA wild
Exp081060	2	NO	N0	1	YES	Well-moderately	Colon Adenocarcinoma	1.8	Right Colon	Female	50	0	95	MLH1(+),MSH2(+),MSH6(+),PMS2(+)	pMMR/MSS	KRAS-exon2 mutation
Exp062650	1	NO	N0	1	NO	Well-moderately	Colon Adenocarcinoma	1.5	Left Colon	Male	57	0	95	untested	NA	untested
Exp062652	1	NO	N0	1	NO	Well-moderately	Rectal Adenocarcinoma	2.5	Rectal	Female	60	0	90	MLH1(+),MSH2(+),MSH6(+),PMS2(+)	pMMR/MSS	RAS/BRAF/PIK3CA wild
Exp062653	1	NO	N0	0	YES	Well-moderately	Rectal Adenocarcinoma	2	Rectal	Male	47	0	85	untested	NA	untested
Exp062660	1	NO	N0	1	NO	Well-moderately	Colon Adenocarcinoma	1.6	Left Colon	Female	74	0	90	MLH1(+),MSH2(+),MSH6(+),PMS2(+)	pMMR/MSS	RAS/BRAF/PIK3CA wild
Exp081050	1	NO	N0	1	NO	Well-moderately	Rectal Adenocarcinoma	1	Rectal	Female	57	0	85	untested	NA	untested
Exp081051	1	NO	N0	1	NO	Well-moderately	Rectal Adenocarcinoma	2	Rectal	Male	56	1	85	untested	NA	untested
Exp081057	1	NO	N0	1	YES	Well-moderately	Colon Adenocarcinoma	5	Left Colon	Female	79	0	85	untested	NA	untested
Exp081058	1	NO	N0	1	NO	Poorly	Colon Adenocarcinoma	2	Left Colon	Male	70	0	90	untested	NA	untested
Exp062654	2	YES	N1	1	YES	Well-moderately	Rectal Adenocarcinoma	2	Rectal	Male	65	0	80	MLH1(+),MSH2(+),MSH6(+),PMS2(+)	pMMR/MSS	KRAS-exon4 mutation
Exp062661	2	YES	N1	1	YES	Poorly	Colon Mucinous Adenocarcinoma	1.8	Left Colon	Male	62	0	90	MLH1(+),MSH2(+),MSH6(+),PMS2(+)	pMMR/MSS	BRAF-V600E mutation
Exp081020	2	YES	N1	1	NO	Well-moderately	Colon Adenocarcinoma	1.5	Left Colon	Male	59	0	90	MLH1(+),MSH2(+),MSH6(+),PMS2(+)	pMMR/MSS	RAS/BRAF/PIK3CA wild
Exp081029	2	YES	N1	1	NO	Poorly	Rectal Adenocarcinoma	2	Rectal	Male	55	0	90	MLH1(+),MSH2(+),MSH6(+),PMS2(+)	pMMR/MSS	RAS/BRAF/PIK3CA wild
Exp081030	2	YES	N1	1	YES	Well-moderately	Colon Adenocarcinoma	5	Left Colon	Male	86	0	90	MLH1(+),MSH2(+),MSH6(+),PMS2(+)	pMMR/MSS	RAS/BRAF/PIK3CA wild
Exp081044	2	YES	N1	1	NO	Well-moderately	Colon Adenocarcinoma	2	Left Colon	Female	72	0	80	MLH1(+),MSH2(+),MSH6(+),PMS2(+)	pMMR/MSS	RAS/BRAF/PIK3CA wild
Exp081045	2	YES	N1	1	NO	Well-moderately	Colon Adenocarcinoma	1	Right Colon	Female	74	0	90	MLH1(+),MSH2(+),MSH6(+),PMS2(+)	pMMR/MSS	KRAS-exon2 mutation
Exp081052	2	YES	N1	1	NO	Poorly	Colon Mucinous Adenocarcinoma	3	Right Colon	Female	63	0	95	MLH1(+),MSH2(+),MSH6(+),PMS2(+)	pMMR/MSS	KRAS-exon2 mutation
Exp081022	1	YES	N1	1	NO	Well-moderately	Colon Adenocarcinoma	2.5	Left Colon	Male	64	0	85	MLH1(+),MSH2(+),MSH6(+),PMS2(+)	pMMR/MSS	untested
