# Supplementary material for: Proteomic characteristics reveal the signatures and the risks of T1 colorectal cancer metastasis to lymph nodes
Source: eLife journal article supplement (doi:10.7554/elife.82959), 2023-05-09
Supplement: supp [file Figure2-source data2.xlsx]

## Sheet: Sheet1
Figure 2- source data2: Druggability based on the Drug Gene Interaction Database
Druggable protein											Potentially druggable protein
search_term	match_term	match_type	gene	drug	interaction_types	sources	pmids				search_term	match_term	match_type	category	sources
CBR3	CBR3	Definite	CBR3	DOXORUBICIN		PharmGKB	20007405|21048526|18551042				AIP	AIP	Definite	DRUGGABLE GENOME	HopkinsGroom|RussLampel
CBR3	CBR3	Definite	CBR3	CYCLOPHOSPHAMIDE		PharmGKB					AIP	AIP	Definite	ENZYME	Pharos
CBR3	CBR3	Definite	CBR3	FLUOROURACIL		PharmGKB					AIP	AIP	Definite	TRANSCRIPTION FACTOR	Pharos
CBR3	CBR3	Definite	CBR3	EPIRUBICIN		PharmGKB					AIP	AIP	Definite	TRANSCRIPTION FACTOR BINDING	GO
CBR3	CBR3	Definite	CBR3	DAUNORUBICIN		PharmGKB	20007405				ATAD2	ATAD2	Definite	NUCLEAR HORMONE RECEPTOR	Pharos
CES2	CES2	Definite	CES2	IRINOTECAN		PharmGKB					ATAD2	ATAD2	Definite	ENZYME	GuideToPharmacology
CHP1	CHP1	Definite	CHP1	CALCIUM CITRATE	agonist	DrugBank					BAIAP2	BAIAP2	Definite	KINASE	Pharos
F13A1	F13A1	Definite	F13A1	ASPIRIN		PharmGKB	12515735				CBR3	CBR3	Definite	SHORT CHAIN DEHYDROGENASE REDUCTASE	HopkinsGroom
F13A1	F13A1	Definite	F13A1	THROMBIN	activator	DrugBank					CBR3	CBR3	Definite	DRUGGABLE GENOME	HopkinsGroom|HingoraniCasas|RussLampel
GBA	GBA	Definite	GBA	DOMIPHEN BROMIDE		DTC					CBR3	CBR3	Definite	ENZYME	Pharos
GBA	GBA	Definite	GBA	GENTIAN VIOLET		DTC					CBR3	CBR3	Definite	CLINICALLY ACTIONABLE	Tempus
GBA	GBA	Definite	GBA	RALOXIFENE HYDROCHLORIDE		DTC					CEACAM6	CEACAM6	Definite	DRUGGABLE GENOME	HingoraniCasas
GBA	GBA	Definite	GBA	MIGALASTAT		DTC					CEACAM6	CEACAM6	Definite	CELL SURFACE	GO
GNG2	GNG2	Definite	GNG2	HALOTHANE	other/unknown	DrugBank	10913255|12657848|11961592|15175324|12826849				CES2	CES2	Definite	DRUGGABLE GENOME	HingoraniCasas|HopkinsGroom|RussLampel
GPRC5A	GPRC5A	Definite	GPRC5A	TRETINOIN		DrugBank	15677768|15086536				CES2	CES2	Definite	ENZYME	Pharos
GUCY1B3	GUCY1B3	Definite	GUCY1B3	SODIUM NITROPRUSSIDE	activator	ChemblInteractions					CHGA	CHGA	Definite	DRUGGABLE GENOME	HingoraniCasas
GUCY1B3	GUCY1B3	Definite	GUCY1B3	NITROGLYCERIN	activator	ChemblInteractions					CHP1	CHP1	Definite	KINASE	Pharos
GUCY1B3	GUCY1B3	Definite	GUCY1B3	RIOCIGUAT	activator|positive modulator	TdgClinicalTrial|ChemblInteractions					DHCR7	DHCR7	Definite	DRUGGABLE GENOME	HingoraniCasas
GUCY1B3	GUCY1B3	Definite	GUCY1B3	NITRIC OXIDE	activator	ChemblInteractions					DHCR7	DHCR7	Definite	ENZYME	HumanProteinAtlas|Pharos
GUCY1B3	GUCY1B3	Definite	GUCY1B3	ISOSORBIDE MONONITRATE	activator	ChemblInteractions					ENDOG	ENDOG	Definite	DRUGGABLE GENOME	HopkinsGroom|RussLampel
GUCY1B3	GUCY1B3	Definite	GUCY1B3	ISOSORBIDE DINITRATE	activator	ChemblInteractions					F13A1	F13A1	Definite	DRUGGABLE GENOME	HopkinsGroom|HingoraniCasas|RussLampel
PTGIS	PTGIS	Definite	PTGIS	EPOPROSTENOL	inducer	DrugBank	20357747|18081314				F13A1	F13A1	Definite	ENZYME	Pharos
PTK2B	PTK2B	Definite	PTK2B	FOSTAMATINIB	inhibitor	DrugBank	26516587				FARS2	FARS2	Definite	DRUGGABLE GENOME	HingoraniCasas
PTK2B	PTK2B	Definite	PTK2B	BARICITINIB	inhibitor	DrugBank|TTD					FARS2	FARS2	Definite	ENZYME	HumanProteinAtlas
PTK2B	PTK2B	Definite	PTK2B	LEFLUNOMIDE	antagonist	DrugBank	17103252|17604599|19149483				FKBP10	FKBP10	Definite	DRUGGABLE GENOME	RussLampel|HopkinsGroom|HingoraniCasas
RAB9A	RAB9A	Definite	RAB9A	HYDRALAZINE		DTC					FKBP10	FKBP10	Definite	ENZYME	HumanProteinAtlas
RAB9A	RAB9A	Definite	RAB9A	PHENELZINE		DTC					GAL3ST2	GAL3ST2	Definite	ENZYME	Pharos
RAB9A	RAB9A	Definite	RAB9A	LEFLUNOMIDE		DTC					GBA	GBA	Definite	DRUGGABLE GENOME	RussLampel|HingoraniCasas
RAB9A	RAB9A	Definite	RAB9A	RABEPRAZOLE SODIUM		DTC					GBA	GBA	Definite	ENZYME	HumanProteinAtlas|GuideToPharmacology
RAB9A	RAB9A	Definite	RAB9A	LANSOPRAZOLE		DTC					GID8	GID8	Definite	TRANSCRIPTION FACTOR	Pharos
RAB9A	RAB9A	Definite	RAB9A	RILUZOLE		DTC					GPC1	GPC1	Definite	DRUGGABLE GENOME	HingoraniCasas
RAB9A	RAB9A	Definite	RAB9A	NICLOSAMIDE		DTC					GPC1	GPC1	Definite	CELL SURFACE	GO
RAB9A	RAB9A	Definite	RAB9A	AMLEXANOX		DTC					GPRC5A	GPRC5A	Definite	DRUGGABLE GENOME	RussLampel
RBP1	RBP1	Definite	RBP1	ACITRETIN	agonist	DrugBank	8375617				GPRC5A	GPRC5A	Definite	G PROTEIN COUPLED RECEPTOR	IDG|Pharos|GO|dGene|GuideToPharmacology
RRM2	RRM2	Definite	RRM2	GALLIUM NITRATE	inhibitor	DrugBank|ChemblInteractions	12776257|1335254|15651176				GUCY1B3	GUCY1B3	Definite	DRUGGABLE GENOME	HingoraniCasas|RussLampel|HopkinsGroom
RRM2	RRM2	Definite	RRM2	GEMCITABINE	inhibitor	ClearityFoundationClinicalTrial|GuideToPharmacology|TTD					KPNA2	KPNA2	Definite	NUCLEAR HORMONE RECEPTOR	Pharos
RRM2	RRM2	Definite	RRM2	CYTARABINE		PharmGKB	24024897				L3HYPDH	L3HYPDH	Definite	ENZYME	Pharos
RRM2	RRM2	Definite	RRM2	FLUDARABINE PHOSPHATE	inhibitor	ChemblInteractions					MX2	MX2	Definite	TUMOR SUPPRESSOR	GO
RRM2	RRM2	Definite	RRM2	CLOFARABINE	inhibitor	ChemblInteractions|GuideToPharmacology					NCF1	NCF1	Definite	ENZYME	Pharos
RRM2	RRM2	Definite	RRM2	CLADRIBINE	inhibitor	DrugBank|PharmGKB	24024897|17852710|16316309|19576186|9923554|19715446				NPEPL1	NPEPL1	Definite	PROTEASE	dGene
RRM2	RRM2	Definite	RRM2	HYDROXYUREA	inhibitor	ChemblInteractions|GuideToPharmacology|TTD					NPEPL1	NPEPL1	Definite	ENZYME	GuideToPharmacology
RRM2	RRM2	Definite	RRM2	GEMCITABINE HYDROCHLORIDE	inhibitor	ChemblInteractions					NUDT1	NUDT1	Definite	ENZYME	Pharos
SLC5A1	SLC5A1	Definite	SLC5A1	EMPAGLIFLOZIN	inhibitor	GuideToPharmacology					NUDT1	NUDT1	Definite	DNA REPAIR	GO
SLC5A1	SLC5A1	Definite	SLC5A1	ERTUGLIFLOZIN	inhibitor	GuideToPharmacology					NUP153	NUP153	Definite	DRUGGABLE GENOME	RussLampel|HopkinsGroom
SLC5A1	SLC5A1	Definite	SLC5A1	STREPTOZOCIN		NCI	1722397				OGT	OGT	Definite	ENZYME	HumanProteinAtlas
SLC5A1	SLC5A1	Definite	SLC5A1	DAPAGLIFLOZIN	inhibitor	GuideToPharmacology					OSBPL5	OSBPL5	Definite	TRANSPORTER	Pharos
SLC5A1	SLC5A1	Definite	SLC5A1	CANAGLIFLOZIN	inhibitor	GuideToPharmacology	23590413				OTUD6B	OTUD6B	Definite	ENZYME	HumanProteinAtlas|Pharos
SQLE	SQLE	Definite	SQLE	NAFTIFINE	inhibitor	DrugBank|TTD	1951574|12499173|8834895|3877503|11752352|1287164				P4HA2	P4HA2	Definite	ENZYME	HumanProteinAtlas|Pharos
SQLE	SQLE	Definite	SQLE	BUTENAFINE	inhibitor	DrugBank	18624686|12499173|17642865|16079485|8494375|11752352				PARN	PARN	Definite	ENZYME	HumanProteinAtlas
SQLE	SQLE	Definite	SQLE	TERBINAFINE	inhibitor	DrugBank	19874252|12226513|12963042|12100530|12477372|11752352|14638499|1543672				PCOLCE	PCOLCE	Definite	DRUGGABLE GENOME	HingoraniCasas
SQLE	SQLE	Definite	SQLE	TOLNAFTATE		TTD					PLOD1	PLOD1	Definite	DRUGGABLE GENOME	HingoraniCasas
SQLE	SQLE	Definite	SQLE	AMIODARONE		DTC	16451055				PLOD1	PLOD1	Definite	ENZYME	HumanProteinAtlas|Pharos
STK3	STK3	Definite	STK3	FOSTAMATINIB	inhibitor	DrugBank	26516587				PRELP	PRELP	Definite	DRUGGABLE GENOME	HingoraniCasas
STK4	STK4	Definite	STK4	BOSUTINIB	inhibitor	GuideToPharmacology					PTGIS	PTGIS	Definite	DRUGGABLE GENOME	HopkinsGroom|RussLampel
VWF	VWF	Definite	VWF	RIBAVIRIN		NCI	15644045				PTGIS	PTGIS	Definite	CYTOCHROME P450	HopkinsGroom
VWF	VWF	Definite	VWF	ACETYLCYSTEINE		NCI	15753537				PTGIS	PTGIS	Definite	ENZYME	Pharos|GuideToPharmacology
VWF	VWF	Definite	VWF	MITOMYCIN		NCI	2104558				PTK2B	PTK2B	Definite	KINASE	HopkinsGroom|Pharos|dGene
VWF	VWF	Definite	VWF	PREDNISONE		NCI	3146197				PTK2B	PTK2B	Definite	DRUGGABLE GENOME	HopkinsGroom|RussLampel|HingoraniCasas
VWF	VWF	Definite	VWF	STREPTOZOCIN		NCI	16422885|3928783				PTK2B	PTK2B	Definite	G PROTEIN COUPLED RECEPTOR	Pharos
VWF	VWF	Definite	VWF	THALIDOMIDE		NCI	12871448				PTK2B	PTK2B	Definite	ION CHANNEL	Pharos
VWF	VWF	Definite	VWF	WARFARIN		NCI	7626351				PTK2B	PTK2B	Definite	DRUG RESISTANCE	GO
VWF	VWF	Definite	VWF	PENTOXIFYLLINE		NCI	1719289				PTK2B	PTK2B	Definite	TYROSINE KINASE	GO|dGene
VWF	VWF	Definite	VWF	CAPLACIZUMAB	inhibitor	DrugBank|TdgClinicalTrial|ChemblInteractions|TTD					PTK2B	PTK2B	Definite	ENZYME	GuideToPharmacology
VWF	VWF	Definite	VWF	PHENYLEPHRINE		NCI	16996954				RAB9A	RAB9A	Definite	DRUGGABLE GENOME	HingoraniCasas
VWF	VWF	Definite	VWF	VINCRISTINE		NCI	3875694				RAB9A	RAB9A	Definite	ENZYME	Pharos
WNK1	WNK1	Definite	WNK1	HYDROCHLOROTHIAZIDE		PharmGKB	18591455				RRM2	RRM2	Definite	DRUGGABLE GENOME	HingoraniCasas
											RRM2	RRM2	Definite	ENZYME	GuideToPharmacology
											SERPINB5	SERPINB5	Definite	PROTEASE INHIBITOR	HopkinsGroom|dGene
											SERPINB5	SERPINB5	Definite	DRUGGABLE GENOME	HopkinsGroom|HingoraniCasas
											SERPINB8	SERPINB8	Definite	PROTEASE INHIBITOR	HopkinsGroom|dGene
											SERPINB8	SERPINB8	Definite	DRUGGABLE GENOME	HopkinsGroom|RussLampel|HingoraniCasas
											SERPINE2	SERPINE2	Definite	DRUGGABLE GENOME	HingoraniCasas|RussLampel|HopkinsGroom
											SERPINE2	SERPINE2	Definite	PROTEASE INHIBITOR	HopkinsGroom|dGene
											SHC1	SHC1	Definite	KINASE	Pharos
											SLC5A1	SLC5A1	Definite	DRUGGABLE GENOME	RussLampel|HingoraniCasas
											SLC5A1	SLC5A1	Definite	TRANSPORTER	HumanProteinAtlas|Pharos|GuideToPharmacology
											SLC5A1	SLC5A1	Definite	EXTERNAL SIDE OF PLASMA MEMBRANE	GO
											SQLE	SQLE	Definite	DRUGGABLE GENOME	HingoraniCasas|RussLampel|HopkinsGroom
											SQLE	SQLE	Definite	ENZYME	Pharos|GuideToPharmacology
											STK3	STK3	Definite	DRUGGABLE GENOME	RussLampel|HingoraniCasas|HopkinsGroom
											STK3	STK3	Definite	KINASE	HopkinsGroom|IDG|Pharos|dGene
											STK3	STK3	Definite	SERINE THREONINE KINASE	GO|dGene
											STK3	STK3	Definite	ENZYME	GuideToPharmacology
											STK4	STK4	Definite	DRUGGABLE GENOME	RussLampel|HopkinsGroom|HingoraniCasas
											STK4	STK4	Definite	KINASE	HopkinsGroom|Pharos|dGene
											STK4	STK4	Definite	ENZYME	HumanProteinAtlas|GuideToPharmacology
											STK4	STK4	Definite	SERINE THREONINE KINASE	GO|dGene
											STK4	STK4	Definite	TRANSCRIPTION FACTOR BINDING	GO
											UBE2Z	UBE2Z	Definite	ENZYME	Pharos
											VWF	VWF	Definite	DRUGGABLE GENOME	RussLampel|HingoraniCasas
											WNK1	WNK1	Definite	DRUGGABLE GENOME	HingoraniCasas|RussLampel
											WNK1	WNK1	Definite	ENZYME	HumanProteinAtlas|GuideToPharmacology
											WNK1	WNK1	Definite	KINASE	Pharos|dGene
											WNK1	WNK1	Definite	SERINE THREONINE KINASE	GO|dGene
											WNK1	WNK1	Definite	EXTERNAL SIDE OF PLASMA MEMBRANE	GO
											YAP1	YAP1	Definite	CLINICALLY ACTIONABLE	MskImpact
											YAP1	YAP1	Definite	KINASE	Pharos
											YAP1	YAP1	Definite	TRANSCRIPTION FACTOR	Pharos
											ZG16	ZG16	Definite	DRUGGABLE GENOME	HingoraniCasas
