# Supplementary material for: Proteomic characteristics reveal the signatures and the risks of T1 colorectal cancer metastasis to lymph nodes
Source: eLife journal article supplement (doi:10.7554/elife.82959), 2023-05-09
Supplement: supp [file Figure2-source data4.xlsx]

## Sheet: Sheet1
Figure 2- source data4: Immune composition of T1 CRC from xCell
Symbol	Exp062466	Exp062467	Exp062468	Exp062469	Exp062470	Exp062471	Exp062474	Exp062475	Exp062476	Exp062477	Exp062479	Exp062480	Exp062481	Exp062482	Exp062483	Exp062484	Exp062485	Exp062486	Exp062487	Exp062488	Exp062489	Exp062492	Exp062494	Exp062495	Exp062496	Exp062497	Exp062498	Exp062499	Exp062500	Exp062501	Exp062502	Exp062503	Exp062504	Exp062505	Exp062506	Exp062507	Exp062508	Exp062509	Exp062510	Exp062511	Exp062512	Exp062513	Exp062514	Exp062515	Exp062516	Exp062517	Exp062518	Exp062519	Exp062520
Adipocytes	0.105	0.0255	0.0026	0.0647	0.0387	0.0585	0.046	0.0081	0.0381	0.0555	0.0281	0.0193	0.0197	0.0734	0.0392	0.0079	0	0.0888	0.0374	0.0643	0.0767	0.0388	0	0.0346	0.0947	0.0633	0	0.0109	0.0416	0	0.089	0.0477	0.0409	0.0886	0.0646	0.0324	0.0816	0.0115	0.0436	0.1022	0.096	0.0384	0.0417	0.039	0.0064	0.0813	0.0207	0.0311	0.0209
Astrocytes	0	0.0047	0	0	0	0.0221	0	0	0.0025	0	0	0	0	0	0	0	0	0.0057	0	0	0	0	0	0	0	0.0313	0	0	0	0	0	0.0166	0.0211	0	0.0039	0.012	0.0242	0.0019	0	0	0	0	0	0	0	0.0431	0	0	0.0436
B-cells	0	0.0832	0	0	0.016	0.0641	0	0.0049	0	0	0	0	0.0489	0	0.055	0	0.0564	0	0	0.0268	0.0436	0	0.0258	0.0247	0.0576	0	0.0072	0.0427	0.0676	0	0.0393	0.0093	0.0112	0.0212	0.0227	0.0584	0	0.0317	0	0	0.1264	0.059	0.0511	0	0	0.0493	0.0678	0	0
Basophils	0.1825	0.0218	0.0243	0	0.1604	0.1287	0.128	0	0.1618	0.1277	0.1937	0.0719	0.1355	0.022	0	0.0115	0.0606	0.0412	0.0362	0	0.1005	0.052	0.2142	0.1607	0.1031	0	0.1493	0.1644	0.0302	0.1669	0.105	0.0725	0.115	0	0.0108	0	0.1424	0.1282	0.1721	0.2154	0.1502	0	0.0548	0.1755	0.2569	0	0.109	0.1228	0.3861
CD4+ T-cells	0.1377	0.0926	0.0828	0.0971	0.111	0.0904	0.0483	0	0.0587	0.0785	0	0.0314	0.0425	0.0481	0.0575	0.0787	0.1115	0.0168	0.0625	0.0036	0.0832	0	0.0246	0.1274	0.1304	0.0824	0.0717	0	0.1519	0.1849	0.063	0.0466	0.0776	0.0427	0.0329	0.1383	0	0.1247	0.1246	0.0792	0.0746	0.0589	0	0.117	0.1406	0.0754	0.1013	0.0236	0.1043
CD4+ Tcm	0.062	0	0.0922	0.037	0	0.0417	0	0.0383	0.0546	0.0849	0.0276	0.0384	0.0634	0.0625	0.0858	0.1087	0.0215	0.0144	0.14	0.1082	0.1319	0.0988	0.1265	0.0259	0.1285	0.0176	0.0519	0.0233	0.0484	0	0.0907	0.0413	0.0269	0.0517	0.0245	0.0979	0	0	0	0.0303	0.1226	0.0273	0.052	0.0629	0.003	0.0056	0	0.0892	0.0167
CD4+ Tem	0.1053	0.0334	0.1097	0.0855	0.0424	0.1121	0.0361	0.0941	0.2089	0.1443	0.1239	0.1583	0.0895	0.0712	0.0387	0.074	0.0087	0.1423	0.1236	0.1249	0.1255	0.1205	0.0971	0.0675	0.1338	0.068	0.0755	0.1335	0.0782	0	0.1655	0.0526	0.1148	0.0577	0.1326	0.13	0.135	0	0	0.1486	0.1061	0.0703	0.1124	0.1028	0.102	0.0461	0	0.1129	0.123
CD4+ memory T-cells	0.2574	0.2384	0.2753	0.1597	0.0338	0.2249	0.0261	0.1401	0.2099	0.1717	0.0904	0.2061	0.1086	0.2174	0.1879	0.2134	0.2459	0.1729	0.2305	0.1205	0.1885	0.1679	0.1632	0.1373	0.2102	0.1128	0.2617	0.0267	0.1282	0.2267	0.1777	0.1769	0.2076	0.2073	0.1646	0.1828	0.0607	0.204	0.173	0.2049	0.1977	0.1546	0.1098	0.2572	0.2076	0.1702	0.2271	0.1775	0.2611
CD4+ naive T-cells	0	0.0306	0	0	0	0.0263	0	0	0.0305	0	0	0	0	0	0.039	0.0331	0	0.0258	0	0	0	0.0438	0	0.0143	0	0.0048	0	0	0	0	0	0	0	0	0	0	0	0	0.0033	0	0	0.0015	0	0	0.0067	0	0.0677	0.0469	0.0667
CD8+ T-cells	0.0097	0	0.06	0.0026	0.0358	0.0703	0.0322	0.0662	0.0098	0.0451	0.0773	0.0005	0.0031	0	0	0	0.0036	0.0612	0.0269	0.0496	0.0165	0.0434	0.0397	0.0603	0	0.0068	0.0329	0	0	0	0.0051	0.0288	0	0.0213	0.0674	0.0694	0.0676	0.0249	0.0136	0.0416	0.0054	0.0545	0	0.0313	0.0391	0	0.0293	0.053	0.0688
CD8+ Tcm	0.1004	0	0.1669	0	0.0378	0.2559	0.0257	0.1407	0.0262	0.1436	0	0	0.0382	0.1031	0.0137	0	0.0546	0	0	0	0.0414	0	0	0.1152	0	0	0	0.022	0.0275	0	0.0613	0.0456	0	0.0747	0.0082	0.1409	0.0651	0.0578	0.0934	0.0298	0.0898	0	0	0	0	0	0	0.0936	0.1043
CD8+ Tem	0	0	0	0	0	0.0841	0	0	0.0089	0	0	0	0	0	0	0	0	0.037	0.0015	0	0	0	0	0	0	0	0	0	0	0	0	0	0	0	0.0043	0.0162	0	0	0	0	0	0	0	0	0	0	0	0	0.0845
CD8+ naive T-cells	0.0856	0.1436	0.284	0.3156	0.2403	0.0085	0.2524	0.2279	0.1796	0.2399	0.2577	0.146	0.1208	0.0674	0.4023	0.2461	0.1873	0.082	0.15	0.3401	0.1742	0.3381	0.1905	0.2296	0.1989	0.3118	0.2567	0.2103	0.1069	0.1363	0.171	0.2676	0.244	0.2325	0.2562	0.2035	0.1446	0.0657	0.1585	0.2201	0.0956	0.1539	0.0796	0.3426	0.3145	0.1901	0.3363	0.2412	0.1654
CLP	0.197	0.2858	0.2613	0.2716	0.3175	0.2454	0.2999	0.1743	0.1576	0.1857	0.2243	0.2802	0.211	0.2116	0.2693	0.2499	0.1932	0.26	0.2705	0.1979	0.1672	0.1365	0.205	0.1474	0.075	0.2336	0.2016	0.2829	0.1926	0.1895	0.1247	0.2115	0.2061	0.2779	0.1909	0.1216	0.1683	0.1818	0.2221	0.1168	0.2222	0.2074	0.2031	0.1426	0.185	0.263	0.2037	0.1045	0.262
CMP	0.0992	0.1015	0.0744	0.1223	0.0844	0.1668	0.1116	0.1145	0.1099	0.1563	0.107	0.0568	0.1054	0.1076	0.1005	0.0861	0.1384	0.1273	0.1301	0.1039	0.0887	0.0786	0.1523	0.1716	0.1091	0.176	0.1114	0.0209	0.0634	0.1528	0.1522	0.1275	0.1343	0.0895	0.1326	0.176	0.0848	0.0975	0.1118	0.1059	0.177	0.0985	0.1442	0.1336	0.1626	0.1102	0.1124	0.1364	0.1203
Chondrocytes	0.0894	0	0	0.0594	0.0112	0.1303	0.1346	0.1011	0.0629	0.063	0.1127	0.113	0.1451	0.0824	0.1289	0.068	0	0.1622	0.0626	0.1455	0.0689	0.1666	0.1078	0.1197	0.1787	0.1115	0	0.1947	0	0.0045	0.1271	0.0359	0.0521	0.0448	0.1294	0.128	0.2148	0.1411	0.1063	0.0863	0.0494	0.1322	0.1093	0.0044	0.1004	0.0821	0	0.2027	0
Class-switched memory B-cells	0	0.0355	0	0	0.0715	0.0575	0.0063	0.0821	0	0	0	0.0524	0.0822	0.0659	0.0016	0	0.0567	0	0	0	0.0026	0.0454	0	0.0702	0.0904	0	0	0.0748	0.0259	0	0	0	0	0.0043	0.0143	0.112	0.0499	0.118	0	0	0.0882	0.0283	0.0084	0	0.0025	0.0293	0	0	0
DC	0.0287	0.1012	0.0246	0.0582	0.0899	0.0607	0.0574	0.0879	0.0803	0.0566	0.0873	0.0163	0.0515	0.0242	0.0932	0.0845	0.0679	0.0327	0.0819	0.0904	0.0206	0.1191	0.0331	0.0567	0.0649	0.0662	0.0893	0.0867	0	0.0167	0.0574	0.0537	0.0508	0.0519	0.0649	0.0785	0.105	0.065	0.0922	0.0613	0	0.1133	0.0014	0.0632	0.077	0.1133	0.0253	0.0838	0.0346
Endothelial cells	0.0079	0.0263	0	0	0	0	0.0023	0	0.0261	0	0	0.0134	0	0	0	0	0	0.0122	0	0.0642	0.0034	0.08	0	0	0	0	0	0.0095	0.0602	0	0	0	0	0.0182	0	0	0	0	0	0	0	0.0772	0.0095	0	0	0	0	0	0.0011
Eosinophils	0.3282	0.2965	0.1306	0.3491	0.3554	0.241	0.3718	0.3109	0.3654	0.1914	0.2237	0.2708	0.2209	0.2227	0.3004	0.3548	0.1993	0.287	0.3266	0.4162	0.2626	0.4647	0.3466	0.2843	0.2933	0.4496	0.3316	0.3033	0.2477	0.1719	0.2733	0.4131	0.2389	0.2604	0.2949	0.2351	0.3589	0.2761	0.3752	0.2469	0.1509	0.423	0.1608	0.2197	0.28	0.3577	0.1977	0.3916	0.22
Epithelial cells	0.2918	0.2224	0.263	0.1741	0.2077	0.2113	0.245	0.2865	0.1487	0.2402	0.2511	0.2511	0.2019	0.2465	0.2364	0.1936	0.2153	0.1961	0.173	0.2175	0.2571	0.1999	0.156	0.1165	0.1539	0.117	0.1734	0.199	0.2818	0.2309	0.1843	0.2084	0.2158	0.2665	0.1435	0.1433	0.0788	0.2515	0.193	0.2055	0.2201	0.2388	0.2439	0.2191	0.1428	0.2011	0.224	0.2596	0.2159
Erythrocytes	0	0	0	0	0	0	0	0	0	0	0	0	0	0	0	0	0	0	0	0	0	0	0	0	0	0	0	0	0	0	0	0	0	0	0	0	0	0	0	0	0	0	0	0	0	0	0	0	0
Fibroblasts	0	0	0	0.0315	0	0	0	0	0.023	0	0.0364	0	0.0114	0	0.0144	0.0159	0	0	0	0.0733	0	0.088	0	0	0.0162	0	0	0.0742	0	0	0.051	0	0	0	0.0259	0.0769	0.1588	0	0.0847	0	0	0	0	0	0	0	0	0.1551	0
GMP	0.3493	0.3873	0.3562	0.3572	0.1919	0.3429	0.2177	0.4314	0.3331	0.3337	0.3821	0.3613	0.4063	0.3725	0.4282	0.3952	0.3789	0.3381	0.3438	0.3427	0.2597	0.3992	0.3328	0.3533	0.3865	0.2946	0.3938	0.3385	0.2424	0.3182	0.3785	0.3276	0.412	0.3468	0.4202	0.3924	0.3952	0.3515	0.3827	0.4517	0.3945	0.357	0.3354	0.4265	0.3895	0.311	0.3898	0.3943	0.344
HSC	0.4304	0.3744	0.4551	0.4614	0.4917	0.4003	0.4872	0.3614	0.3418	0.4853	0.371	0.44	0.6272	0.4188	0.5103	0.3402	0.4003	0.3593	0.3326	0	0.4234	0.4547	0.3289	0.4597	0.4896	0.4482	0.3787	0.2401	0	0.4191	0.5374	0.4276	0.3412	0	0.3757	0.3311	0.5927	0.3683	0.5177	0.551	0.5818	0.2755	0.5616	0.4828	0.251	0.3966	0.3011	0.4966	0.3872
Hepatocytes	0.0078	0	0.01	0.0252	0	0.0088	0	0.0134	0	0.0234	0	0	0.0394	0	0.0033	0.0272	0	0.0286	0.0025	0	0	0.0012	0	0	0	0	0.0055	0	0.0056	0.0167	0.0315	0	0	0	0.0284	0.0144	0.0268	0	0.0086	0.034	0	0	0.0014	0	0	0	0.0064	0.0093	0
Keratinocytes	0.1875	0.1703	0.2008	0.1477	0.1764	0.1475	0.1924	0.2207	0.1433	0.1989	0.1847	0.2106	0.1928	0.2025	0.1752	0.1582	0.2037	0.1766	0.1638	0.1706	0.1896	0.1335	0.1492	0.1185	0.1125	0.1258	0.1478	0.127	0.1979	0.2133	0.1666	0.1578	0.2266	0.2003	0.1349	0.1306	0.11	0.2213	0.1627	0.1555	0.1816	0.1851	0.1929	0.2026	0.1227	0.1728	0.1766	0.1796	0.1791
MEP	0	0	0	0	0	0	0	0	0	0	0	0	0	0	0	0	0	0	0	0	0	0	0	0	0	0	0	0	0	0	0	0	0	0	0	0	0	0	0	0	0	0	0	0	0	0	0	0	0
MPP	0.2869	0.2653	0.1608	0.3816	0.7335	0.4331	0.2778	0.3596	0.4604	0.3193	0.3002	0.2395	0.2902	0.3893	0.3495	0.3925	0.2759	0.3337	0.3669	0.5213	0.247	0	0.4487	0.4359	0.4729	0.6741	0.43	0.6929	0.2761	0.3492	0.4341	0.3922	0.4563	0.3065	0.4765	0.4754	0.4894	0.4418	0.4577	0.3702	0.2596	0.3775	0.3158	0.3093	0.4813	0.6542	0.3409	0.4456	0.3977
MSC	0.1807	0.0964	0.2485	0.2349	0.3308	0.0287	0.1245	0.0944	0.1725	0.4629	0.0266	0.2927	0.2982	0.2754	0.0776	0.3908	0.4213	0.1024	0.2179	0.1425	0.2054	0.2391	0.2077	0.3078	0.2468	0	0.3862	0.0637	0.0612	0.2984	0.2429	0.1161	0.1029	0.1556	0	0.269	0.0013	0.1224	0.3613	0.2503	0.2555	0.207	0.2947	0.6067	0.2799	0	0.1803	0.06	0.1914
Macrophages	0.0827	0.0236	0.0777	0.0361	0.04	0.0319	0.01	0.041	0.0581	0.0257	0.0149	0.0447	0.0424	0.0687	0	0.0188	0.0531	0.032	0.0311	0.0571	0.038	0.0458	0.0874	0.0474	0.0543	0.0484	0.0556	0.0249	0.0557	0.0774	0.0577	0.048	0.056	0.0967	0.0569	0.0495	0.0291	0.0681	0.0746	0.0569	0.0521	0.0146	0.0922	0.0135	0.0503	0.008	0.0275	0.0342	0.1094
Macrophages M1	0	0.0194	0.0273	0.0035	0	0.012	0.0097	0.0076	0.0185	0	0.0015	0.0293	0.0027	0	0	0.0001	0.0293	0.0046	0	0.0117	0.0277	0.0144	0.0275	0.0142	0	0	0.021	0.0094	0.0088	0.0287	0	0.0053	0.005	0.0084	0.0079	0.037	0.019	0.042	0.0293	0.0107	0.0044	0.0256	0.0193	0	0	0	0.019	0.0254	0.0329
Macrophages M2	0.2161	0.0418	0.0404	0.1016	0.1784	0.0286	0.1433	0	0.0272	0.1069	0	0	0.0981	0.1801	0.0765	0	0.0556	0.1634	0.0703	0.1032	0.0552	0	0.0536	0.0657	0.1938	0.1823	0.0551	0	0.1673	0.0805	0.1868	0.0915	0.2015	0.1793	0.1104	0.0294	0.0471	0.044	0.055	0.1199	0.2569	0.0329	0.1501	0.1095	0	0.1554	0.0864	0	0.1184
Mast cells	0.0333	0.0159	0.0194	0.0322	0.0312	0.0315	0.0285	0	0.0081	0.0153	0.0168	0.0054	0.0217	0.022	0	0.0204	0.0171	0.0043	0.0179	0	0.0135	0.0053	0.019	0.0496	0.0284	0.0113	0.0173	0.0091	0	0.0076	0.0431	0.0251	0.0338	0	0.0328	0.0339	0.0171	0.0174	0.0395	0.0194	0.0205	0.0283	0.0089	0.0273	0.0473	0.0233	0.018	0.0169	0.0128
Megakaryocytes	0.0595	0.0828	0.0672	0.0905	0	0	0.1364	0	0.0676	0.05	0	0.1177	0.0574	0.0331	0.0487	0.0175	0	0.0067	0.0265	0.0315	0.1066	0.0457	0.0321	0.0349	0.045	0.0492	0.0176	0.046	0.0389	0.078	0.0456	0.0852	0	0.0521	0.0228	0	0.0168	0.0274	0.0066	0.0711	0.0586	0.0425	0.132	0	0	0.0298	0.02	0	0.0345
Melanocytes	0.0746	0.0447	0.0352	0.0026	0.0702	0.0113	0.1062	0.0605	0.0491	0.0389	0.0722	0.0355	0.0672	0.0596	0.059	0.0429	0.0376	0	0.0225	0.0505	0.0772	0.042	0.0491	0.0559	0.0612	0.0221	0.0781	0.0695	0.0454	0.0393	0.0497	0.0653	0	0.0926	0.0723	0.0326	0.0744	0.0581	0.0539	0.0586	0.0467	0.0672	0.0388	0.0325	0.0238	0.0568	0.0162	0.0203	0.0247
Memory B-cells	0	0.1336	0.029	0	0	0	0	0.101	0	0	0	0.0023	0.086	0	0	0	0	0	0	0	0	0	0	0	0.0086	0	0	0	0.0086	0	0	0	0	0	0	0	0.0019	0.0475	0	0	0.0983	0	0	0	0	0	0	0	0
Mesangial cells	0.0243	0.0184	0.0008	0.0165	0.027	0.0076	0.0367	0.0158	0.0272	0.0006	0.0093	0.022	0.0177	0	0.0233	0.0071	0.0133	0.0245	0.0244	0.0066	0.0211	0.0078	0.0255	0.0202	0.0717	0.0469	0	0.0894	0	0	0.0075	0.0398	0.0312	0.0028	0.0305	0.0221	0.0432	0	0.0176	0.0139	0	0	0.0072	0	0	0.0026	0	0.03	0.0138
Monocytes	0	0	0	0.0344	0	0.0539	0	0	0.0317	0	0	0	0.0594	0.0929	0	0.027	0	0.0458	0.0421	0.0257	0	0	0.0848	0	0	0.0411	0	0	0	0.0412	0	0	0.097	0	0.0499	0.0484	0.0625	0.0571	0	0.0465	0	0	0	0	0.0192	0	0	0.086	0.0798
Myocytes	0.0383	0.0302	0.0292	0.0259	0.0055	0.0303	0.0366	0.0201	0.0509	0	0.0075	0.0405	0	0.0209	0.1697	0.1283	0.0237	0.013	0	0.0413	0.0412	0.0168	0.014	0	0.0452	0.048	0.0015	0.0266	0.0733	0.0249	0.0228	0.0484	0.0168	0.0537	0.0293	0.0134	0.0608	0.0151	0.0242	0.0218	0.0236	0.0055	0.0072	0.0139	0.0096	0.0109	0.0355	0.0285	0.029
NK cells	0.0246	0	0	0.0102	0	0	0	0	0	0	0	0	0	0	0	0	0	0	0	0	0	0	0	0	0	0	0.0039	0	0	0	0	0	0	0	0	0	0	0	0	0	0	0.0534	0	0	0	0	0	0	0
NKT	0.13	0.2712	0.1837	0.2706	0.3327	0.1756	0.3746	0.4814	0.2935	0.1027	0.3888	0.3852	0.169	0.2794	0.4164	0.2482	0.252	0.2992	0.2731	0.2797	0.2721	0.4335	0.3066	0.2091	0.2945	0.3644	0.2023	0.5169	0.2691	0.2673	0.2708	0.3363	0.2355	0.3774	0.4413	0.1769	0.4873	0.2865	0.2995	0.1715	0.1378	0.2416	0.4485	0.099	0.2014	0.2996	0.1838	0.3328	0.1361
Neurons	0.0193	0.0236	0.0176	0.0208	0.0362	0.0111	0.0316	0.0184	0.0244	0.0323	0.0123	0.0308	0.0199	0.0237	0.0224	0.0228	0.0317	0.0386	0.0368	0.0343	0.0246	0.0387	0.0224	0.0266	0.0328	0.0319	0.028	0.0398	0.0182	0.0146	0.0399	0.0233	0.0097	0.0076	0.0099	0.0212	0.0566	0.0204	0.0222	0.035	0.0131	0.0195	0.0198	0.0045	0.0142	0.0186	0.0239	0.0345	0.0244
Neutrophils	0.0328	0.009	0.0197	0.1076	0.0747	0.169	0.0286	0	0.1322	0.0464	0.0227	0.0231	0.1027	0.1014	0.0026	0.1078	0.0261	0.0956	0.1235	0.062	0.0361	0	0.1271	0.0393	0.0355	0.1241	0.0919	0.0231	0	0.0632	0.045	0.0212	0.0607	0.0134	0.0897	0.0548	0.0572	0.0577	0.0324	0.0594	0.0151	0.0044	0	0	0.0395	0.052	0.0544	0.0579	0.0488
Osteoblast	0.0092	0.0614	0	0.0518	0	0.065	0.1039	0.0998	0.0715	0	0.0877	0	0	0.1032	0.0589	0	0.0331	0.1256	0	0.0605	0.0039	0.0055	0	0.1143	0	0.0126	0.0088	0.2531	0.046	0.0271	0.1479	0.039	0.1644	0.307	0.2062	0.1769	0	0.13	0.0368	0.0877	0.1358	0.3532	0.079	0.0622	0.1758	0.2792	0.1564	0.101	0.1347
Pericytes	0.0394	0.0073	0.0021	0.0029	0.0083	0	0.0281	0.003	0.0423	0.027	0.0192	0.0421	0.0045	0.0186	0	0.0081	0.0165	0.03	0	0.046	0.0169	0.0643	0.0208	0.0358	0	0.0056	0.0149	0.0115	0.021	0.0254	0.1182	0	0	0.0272	0.0097	0.0218	0.0263	0.046	0.0104	0.0957	0.0176	0.0156	0.0222	0.0273	0.0337	0.0043	0.0286	0.0287	0.014
Plasma cells	0.0438	0.0333	0.0895	0.1686	0.1466	0.1654	0	0.0704	0.0501	0.0387	0.0355	0	0.0031	0.0672	0.0763	0.119	0.059	0.0709	0.0575	0.0827	0.1051	0	0.029	0	0.0307	0	0	0.0785	0.0906	0	0.1526	0.0339	0.0775	0.1087	0.0936	0.0616	0.0164	0	0.1064	0.0155	0.0872	0.0839	0.0916	0.0262	0.0302	0.0689	0.0605	0	0.0024
Platelets	0.015	0	0.0081	0.1155	0.0002	0	0.0136	0	0.0502	0.0061	0	0.0273	0	0	0	0	0.0104	0.0172	0.0208	0.0366	0.0272	0	0.0216	0.0477	0.0459	0.0213	0	0.0067	0.0142	0	0.0021	0.0294	0	0.0432	0	0	0	0.025	0	0.0003	0	0.0255	0.1087	0	0	0.0097	0	0.0063	0.0131
Preadipocytes	0.0443	0.0425	0.0732	0.0477	0.1847	0.1604	0.0528	0.0198	0.1065	0.0541	0.1129	0.1085	0.1023	0.0742	0.0927	0.0411	0	0.0808	0.0604	0.0846	0.0093	0.087	0.0323	0.0788	0.1501	0.1354	0.0707	0.03	0.0569	0.0532	0.0963	0.062	0.0515	0.0569	0.0953	0.0645	0.1444	0.0403	0.0965	0.1355	0.0767	0	0.0447	0.0244	0.0479	0.0676	0.0504	0.0556	0.0312
Sebocytes	0.0146	0.0119	0.0106	0.0108	0.0139	0.0102	0.0148	0.0206	0.0094	0.0148	0.0141	0.0186	0.0186	0.0172	0.0134	0.0089	0.0145	0.0135	0.0119	0.017	0.0164	0.0147	0.012	0.0105	0.0118	0.0136	0.0111	0.0118	0.0138	0.0222	0.0132	0.0125	0.0252	0.0177	0.0136	0.0079	0.0083	0.0217	0.0158	0.013	0.012	0.0158	0.0144	0.0187	0.0127	0.0184	0.0122	0.0144	0.0142
Skeletal muscle	0.0257	0.0041	0.0039	0.019	0	0	0.0136	0	0.0278	0.0008	0	0.0242	0.0143	0	0.0461	0.0348	0	0.0037	0.0158	0.0396	0.0085	0.0138	0.0069	0	0.009	0.0088	0.0034	0.0158	0	0	0.0051	0.0263	0	0	0	0.0071	0.037	0.0113	0.0075	0.0057	0	0.0138	0	0	0	0.0181	0.0077	0.0133	0.0021
Smooth muscle	0	0.0143	0.031	0	0	0	0	0.0735	0	0	0.08	0	0	0	0.0112	0	0	0	0	0.0284	0	0.013	0	0	0	0	0	0	0.0187	0	0	0.0019	0	0.0324	0	0	0.0157	0	0	0	0	0	0	0	0	0	0	0.0126	0
Tgd cells	0.0081	0.0105	0.0082	0	0	0	0	0	0.0081	0	0	0.0183	0	0	0	0	0.0119	0	0.0001	0	0	0	0.0012	0	0	0	0	0	0	0	0	0	0	0	0	0	0	0	0	0	0.0197	0	0	0	0	0	0.0578	0	0.0109
Th1 cells	0	0.1714	0.1169	0.297	0.1948	0.2732	0.1356	0.2171	0.0954	0.2332	0.1387	0.0098	0.1316	0.3642	0.0874	0.2167	0.2709	0.2263	0.0429	0.2457	0.1046	0.1861	0.1284	0.2885	0.156	0.292	0.3809	0.3195	0.2126	0.2312	0.2332	0.2487	0.2811	0.2811	0.292	0.2399	0.2161	0.1666	0.112	0.2226	0.2925	0.3737	0.1957	0.2739	0.203	0.3203	0.2803	0.1029	0.2741
Th2 cells	0.0596	0.0302	0.1392	0.0665	0	0.0822	0.0261	0.0496	0.1564	0.0748	0.0683	0.1312	0.1041	0	0.1124	0.0787	0.0549	0.069	0.1363	0.0845	0.1249	0	0.0458	0	0.0003	0	0.0496	0.0014	0	0.0524	0.0026	0.1255	0.0645	0.0497	0.0984	0.0844	0.0615	0.0802	0.113	0.0396	0.0593	0	0.0933	0.0864	0.0628	0.0304	0.0294	0.0818	0
Tregs	0.3195	0.3065	0.1399	0	0.2541	0.2081	0.3039	0.2091	0.0206	0.0472	0.1893	0	0.1874	0.2178	0.216	0	0.2207	0	0.1174	0.0176	0.2836	0	0	0.3134	0.1882	0.229	0.0077	0.0252	0.3028	0.2248	0.1546	0.2398	0.1628	0.2563	0.0179	0	0.1691	0.3022	0.2581	0.1814	0	0.2864	0	0	0.2316	0.2785	0.0383	0	0.0264
aDC	0.0359	0.0827	0.0897	0.0673	0.0819	0.054	0.1001	0.0247	0.0848	0.018	0.0719	0.0034	0.0291	0.0717	0.0222	0.04	0.0193	0.0497	0.0314	0.0207	0	0.0224	0.0264	0.0706	0.0425	0	0.0719	0.0266	0	0.0244	0.019	0	0.0094	0.0781	0.0094	0.0488	0.1154	0.0002	0.0967	0.019	0	0.0971	0.0272	0.043	0.0108	0.0333	0.0202	0.0414	0.0163
cDC	0	0.0027	0.0701	0	0	0	0	0.0814	0	0	0.0888	0.077	0	0	0.1144	0.004	0.0175	0	0	0	0	0.0528	0	0	0	0	0	0	0	0	0	0	0	0.0037	0	0	0	0	0	0	0	0	0	0.0738	0	0	0.0104	0	0
iDC	0.0277	0.0656	0.0485	0.004	0.0682	0.0994	0	0.128	0.0228	0.0648	0.1143	0.1251	0.0353	0	0.158	0.0373	0.1259	0.0183	0.0454	0.0988	0.0494	0.128	0.0228	0.0608	0.076	0.0925	0.0658	0.1181	0	0.0066	0.0922	0.0768	0.0633	0	0.1276	0.0758	0.0698	0.1307	0.0797	0.0816	0	0.075	0.0158	0.1123	0.0738	0.1113	0.0147	0.0731	0.0821
ly Endothelial cells	0.0557	0.0282	0	0.0015	0	0	0.0635	0	0.0824	0	0	0.0594	0	0	0	0.0284	0	0.0307	0.0324	0.0791	0.0328	0.0643	0.0437	0.0206	0.0195	0.0337	0.0012	0.0234	0.0619	0.0133	0	0.0382	0	0.0511	0	0	0.0011	0	0.0229	0.0277	0	0.0699	0	0	0.0322	0	0.0101	0	0.0216
mv Endothelial cells	0.0731	0.0572	0.0411	0.0343	0	0.0106	0.024	0	0.0688	0.0259	0.0173	0.0309	0	0.0181	0	0.022	0	0.0371	0.0544	0.1654	0.0697	0.0085	0	0.0037	0.0336	0	0.05	0.0317	0.1275	0	0.0448	0.0327	0	0.0552	0.027	0	0.0106	0	0.0418	0.04	0.021	0.1005	0.0625	0.0648	0.081	0.0079	0.0827	0.0279	0.0426
naive B-cells	0	0.0166	0	0	0	0.074	0	0	0	0	0	0	0	0	0	0	0	0	0	0	0	0	0	0	0	0	0	0	0.0056	0	0	0	0	0	0.036	0	0	0	0	0	0	0.0171	0.0014	0	0	0	0	0	0
pDC	0.0181	0.1206	0.0211	0	0.0642	0	0	0.0542	0	0.0361	0.0096	0.0375	0.113	0.0479	0.0036	0.0141	0.0456	0.026	0.0285	0.0421	0	0	0	0.0769	0.1071	0	0	0	0	0.0155	0	0	0	0	0.0233	0.0075	0	0.0771	0	0.0087	0.1394	0.0528	0	0	0	0	0.0016	0	0
pro B-cells	0.0343	0.1016	0.0914	0.0126	0.1001	0.0877	0.0488	0.0631	0.0331	0.1027	0.0775	0	0.117	0.0499	0.1454	0.0556	0.0607	0.0445	0.1151	0.0322	0	0.0018	0.0471	0.0981	0.098	0.1178	0.0772	0	0.089	0.106	0.0413	0.0455	0.0609	0	0.0778	0.0944	0.055	0.1041	0.0351	0.0451	0.085	0	0.0264	0.068	0.0381	0.1201	0.06	0.0448	0.0449
ImmuneScore	0.4518	0.4147	0.2765	0.485	0.5027	0.5419	0.3845	0.3406	0.4962	0.306	0.2951	0.2615	0.3954	0.3867	0.3391	0.4613	0.3567	0.3836	0.475	0.4876	0.3427	0.4522	0.5254	0.4598	0.4429	0.5533	0.4676	0.3265	0.3486	0.3753	0.3893	0.4305	0.4173	0.3384	0.4747	0.5109	0.4649	0.4818	0.5014	0.4075	0.2967	0.5396	0.2096	0.3147	0.462	0.4527	0.3475	0.498	0.4523
StromaScore	0.0564	0.0259	0.0013	0.0481	0.0194	0.0292	0.0241	0.004	0.0436	0.0278	0.0322	0.0164	0.0156	0.0367	0.0268	0.0119	0	0.0505	0.0187	0.1009	0.04	0.1034	0	0.0173	0.0554	0.0316	0	0.0473	0.0509	0	0.07	0.0238	0.0204	0.0534	0.0452	0.0546	0.1202	0.0058	0.0642	0.0511	0.048	0.0578	0.0256	0.0195	0.0032	0.0406	0.0104	0.0931	0.011
MicroenvironmentScore	0.5082	0.4406	0.2778	0.5331	0.522	0.5711	0.4087	0.3446	0.5398	0.3338	0.3274	0.2778	0.411	0.4234	0.3659	0.4732	0.3567	0.4341	0.4937	0.5885	0.3828	0.5556	0.5254	0.4771	0.4984	0.5849	0.4676	0.3738	0.3995	0.3753	0.4593	0.4544	0.4378	0.3918	0.52	0.5655	0.5851	0.4876	0.5656	0.4586	0.3447	0.5974	0.2352	0.3342	0.4652	0.4933	0.3579	0.5911	0.4633
[truncated: 172 more columns]
