# Supplementary material for: Proteomic characteristics reveal the signatures and the risks of T1 colorectal cancer metastasis to lymph nodes
Source: eLife journal article supplement (doi:10.7554/elife.82959), 2023-05-09
Supplement: supp [file Figure2-source data5.xlsx]

## Sheet: Sheet1
Figure 2-source data5: D2-40 Immunohistochemistry (IHC) staining score
Intensity	% of immunostaining	Score (Intensity * % of immunostaining)
0 – negative	0: 0%	0: equal expression
1 – weak	1: 1 to 25%	1 to 4: low expression
2 – moderate	2: 26 to 50%	5 to 8: medium expression
3 – strong	3: 51 to 75%	9 to 12: high expression
	4: > 75%
			D2-40(PDPN)
	Histological Type	LNM	Intensity	%	Score
15S33676	Adenocarcinoma	0	1	3	3
16S09357	Adenocarcinoma	0	1	3	3
17S11583	Adenocarcinoma	0	2	2	4
17S16705	Adenocarcinoma	0	1	2	2
18S04516	Adenocarcinoma	0	2	2	4
15S22137	Adenocarcinoma	1	1	1	1
S2014-21260	Mucinous Adenocarcinoma	0	1	3	3
19S18486	Mucinous Adenocarcinoma	1	2	2	4
18s35577	Mucinous Adenocarcinoma	1	1	4	4
18S42473	Mucinous Adenocarcinoma	1	2	2	4
18S11490	Mucinous Adenocarcinoma	1	2	4	8
18s05970	Mucinous Adenocarcinoma	1	2	2	4
