# Supplementary material for: Proteomic characteristics reveal the signatures and the risks of T1 colorectal cancer metastasis to lymph nodes
Source: eLife journal article supplement (doi:10.7554/elife.82959), 2023-05-09
Supplement: supp [file Figure3- source data4.xlsx]

## Sheet: prescore
Figure 3- source data4: External validation
			Before batch correction									After batch correction
Symbol	SCORE	LN	ATAD2	CEACAM6	COMMD10	FARS2	ITPR2	RHOT2	SERPINB5	SWAP70	VRK2	ATAD2	CEACAM6	COMMD10	FARS2	ITPR2	RHOT2	SERPINB5	SWAP70	VRK2	SurvivalTime	prognosis	S
CCRC0067	0.99973	N	6.46657	4.27819	0.746389	0	0.573156	0.53812	0.187115	0	0	1.79459	3.73575	0.399664	0	0.0773767	1.00882	0.986165	0.610835	0	1574	1	1
CCRC0069	0.986964	N	3.23328	11.6076	0.14161	0	0.061002	0.277777	0.0551689	0	0	0.751633	9.46829	-0.0152789	0	-0.100514	0.692584	0.893279	0.610835	0	1471	1	1
CCRC0233	0.874139	Y	1.43694	1.06142	0.516915	0	0.15432	0.267201	0.577543	0.262975	0	0.391865	4.2148	0.539053	0	0.0156241	0.354196	2.25181	0.483206	0	404	1	1
TCGA-AA-3526-01A-11	0.859501	N	0	3.36842	2.87368	0	0	3.94737	6.08947	5.04201	0.852631	-0.144085	2.23792	1.54228	0	-0.730764	0.592423	-0.761952	1.72764	0.240667	30	1	1
TCGA-AG-A002-01A-23	0.799002	N	0	4.57895	0	0	2.02005	0.0420053	38.0005	3.24201	0	-0.144085	3.05115	-0.145418	0	-0.046034	-1.25674	12.4951	0.907342	-0.0817605	637	1	1
CCRC0050	0.708826	N	2.11404	0.885154	0.483638	0	0.334714	0.530344	1.73869	0.0442862	0	0.390598	1.08197	0.219388	0	-0.00544351	0.999378	2.07843	0.663732	0	1591	1	1
TCGA-AG-3580-01A-22	0.570856	N	3.02005	3.02005	0	0	3.02005	5.05263	8.03058	0.978947	0.978947	0.871385	2.00389	-0.145418	0	0.292933	1.11576	0.0444578	-0.123978	0.288435	0	1	1
CCRC0072	0.512186	N	0	0	5.37401	0	0.0575915	0.489032	1.89605	0	0	-0.291326	0.389669	3.57471	0	-0.101699	0.949196	2.18921	0.610835	0	1499	1	1
CCRC0235	0.495149	Y	0.121835	5.79175	0.691595	0	0.418123	0.37527	6.43081	0.042748	0	0.00401342	7.66789	0.667444	0	0.147864	0.43348	6.46629	0.322817	0	397	1	1
TCGA-AA-A01C-01A-22	0.484775	Y	0	9.95789	0	0	3.2	6.1	8.44201	3.97895	0.694737	0	6.85955	0.240686	0	0.0482884	0.358969	3.74782	0.900607	-0.0855773	457	1	1
TCGA-AA-3986-01A-12	0.483861	N	3.43058	9.68947	2.20526	0	4.55789	2.20526	0	4.55789	0	1.00942	6.48441	1.14972	0	0.81421	-0.23245	-3.29175	1.50702	-0.0817605	30	1	1
CCRC0113	0.440711	Y	0.141709	1.6358	0.63905	0	0.217186	0.396667	0.38716	0.120658	0	0.0098746	4.63409	0.628823	0	0.0471374	0.449178	2.11473	0.379558	0	1490	1	1
TCGA-AA-A00R-01A-22	0.370737	N	0	0	0	0	0.989474	2.98947	3.93684	6.50053	0	-0.144085	-0.0249863	-0.145418	0	-0.395366	0.138868	-1.65624	2.39231	-0.0817605	30	1	2
CCRC0071	0.330017	N	1.24833	0	1.01537	0	0.23423	0.222982	0.10104	0.713013	0	0.111347	0.389669	0.58421	0	-0.0403453	0.626025	0.925571	1.46248	0	1429	1	2
CCRC0082	0.227498	N	0.497235	0.65293	0.708088	0	0.145592	0.2375	0.276241	0	0	-0.130933	0.900342	0.373385	0	-0.0711329	0.64366	1.04891	0.610835	0	1644	1	2
CCRC0068	0.173648	N	0	0	1.63127	0	0	0.416677	0.237665	0.000138483	0	-0.291326	0.389669	1.00679	0	-0.121703	0.861306	1.02175	0.611001	0	1506	1	2
CCRC0239	0.144248	N	0.268315	0.615999	0.613868	0	0.0676859	0.404721	1.074	0.223291	0	-0.204776	0.871458	0.30874	0	-0.0981926	0.846784	1.61051	0.877543	0	398	1	2
CCRC0049	0.0869292	N	0.0560555	0.808321	0.245195	0	0.0632847	0.659297	0.585199	0	0	-0.273245	1.02188	0.0557909	0	-0.0997213	1.15602	1.2664	0.610835	0	1650	1	2
CCRC0098	0.0215839	N	0.724471	0.59957	0.0096584	0	1.4025	0	0.541863	0	0	-0.0576339	0.858608	-0.105812	0	0.36544	0.355167	1.2359	0.610835	0	1319	1	2
TCGA-AA-A03J-01A-23	0.0158735	N	0.852631	5.20053	0.852631	0	3.46306	9.53058	4.92631	0.852631	0	0.142605	3.46873	0.355326	0	0.443096	3.23603	-1.24518	-0.181543	-0.0817605	1245	1	2
TCGA-AG-A02X-01A-32	0.00730368	N	0	6.74737	0	0	3.06842	4.93684	3.35789	4.93684	0	-0.144085	4.5079	-0.145418	0	0.309327	1.06093	-1.89675	1.67971	-0.0817605	1246	1	2
CCRC0214	0.00671323	N	2.08927	1.5768	0.441351	0	2.82255	0.252088	0.117034	0.296068	0	0.38261	1.62293	0.190375	0	0.858679	0.66138	0.93683	0.964469	0	419	1	2
TCGA-AG-A008-01A-23	0.00574648	N	0.936842	5.86306	0	0	4.84201	3.87368	9.6842	0.936842	0	0.170921	3.91382	-0.145418	0	0.910514	0.557535	0.731436	-0.143166	-0.0817605	423	1	2
TCGA-AA-A02Y-01A-31	0.00157268	N	0	4.00526	2.83058	0	2.83058	7.84201	30	4.00526	2.02005	-0.144085	2.66575	1.51696	0	0.228707	2.4365	9.1714	1.25517	0.682136	1215	1	2
CCRC0070	0.00104845	N	3.93128	7.19004	0.0403301	0	5.21982	0.222828	0.456599	0.142201	0	0.976787	6.01319	-0.0847681	0	1.69134	0.625837	1.17587	0.780685	0	1410	1	2
TCGA-AA-A01I-01A-12	0.000750633	N	0	6.50579	2.47368	0	4.36842	8.02005	36.4526	3.43058	0.76842	-0.144085	4.34561	1.30736	0	0.749984	2.52081	11.8521	0.993279	0.208823	365	1	2
TCGA-AG-A014-01A-12	0.000439766	N	0.757895	6.92631	2.43058	0	5.85263	8.30526	38.3474	3.24201	0	0.110751	4.62811	1.28205	0	1.25308	2.65585	12.6392	0.907342	-0.0817605	484	1	2
TCGA-AA-A00R-01A-31	9.88885e-05	N	0	0	0	0	3.2	3.2	8.03058	7.05263	2.03684	-0.144085	-0.0249863	-0.145418	0	0.353929	0.23855	0.0444578	2.64392	0.688485	30	1	2
TCGA-AF-2691-01A-41	9.38795e-05	N	0	0	0	0	5.00053	9.24201	24.2737	2.25263	0	-0.144085	-0.0249863	-0.145418	0	0.964247	3.09939	6.79247	0.456464	-0.0817605	323	1	2
CCRC0232	2.77273e-05	N	1.01607	13.1319	0	0	4.85005	0.343171	1.57462	0	0	0.0364272	10.6604	-0.112439	0	1.56291	0.772019	1.96292	0.610835	0	398	1	2
TCGA-AG-A015-01A-51	1.05765e-05	N	0.76842	3.23058	0	0	7.07895	8.03058	50.2631	0.76842	0.76842	0.11429	2.14532	-0.145418	0	1.66876	2.52579	17.5894	-0.21992	0.208823	396	1	2
TCGA-AA-A01V-01A-24	1.59411e-09	N	0	0.905263	0	0	8.70526	7.80526	6.83058	8.70526	0	-0.144085	0.58317	-0.145418	0	2.22003	2.41911	-0.454068	3.39706	-0.0817605	1065	1	2
