# Supplementary material for: Proteomic characteristics reveal the signatures and the risks of T1 colorectal cancer metastasis to lymph nodes
Source: eLife journal article supplement (doi:10.7554/elife.82959), 2023-05-09
Supplement: supp [file Figure3-source data1.xlsx]

## Sheet: Sheet1
Figure 3-source data1: Coefficients of 55 protein-markers and the LNM scores of samples using LASSO-logistic regression
Symbol	coefficients
(Intercept)	0.0707876
ABI1	-0.38861
APPL2	-0.141891
ARHGAP5	-1.26423
ASPSCR1	0.569965
ATAD2	1.97073
BAG6	0.043404
BAIAP2	0.642616
BDH2	-0.395664
C9orf64	-0.157247
CARM1	-0.0576181
CCT3	0.0114402
CEACAM6	0.0152895
COMMD10	0.0543769
CPSF3	-0.755907
CYP27A1	-0.0293358
DNAJC8	-0.0275478
DNM1L	0.432296
EIF2B3	-0.248734
ETFA	0.0103715
FAAH	-0.0798979
FARS2	0.0482569
FDXR	-0.00416735
FIBP	-0.141185
GRAP2	-0.494952
HEBP1	-0.0654243
HSPA6	0.0175637
ISLR	0.0966936
ITPR2	-1.87383
MANBA	-2.23902
MPG	-0.388809
MYL6	0.0016495
MYO1A	0.22434
NDUFS3	0.0234729
NUP107	-0.348651
OSBPL5	2.99041
PAAF1	-0.126393
PNKP	-0.0896449
PPM1B	-0.0796859
RHOT2	-0.327843
RUFY1	-0.578261
SEL1L	-0.148804
SERPINB5	0.00468526
SF3A3	-0.0288234
SH3GLB2	-0.0350585
SHMT1	-0.289797
STX18	-0.60538
SWAP70	-0.278866
TBC1D5	0.304858
TTC19	-0.00300874
TUBB6	0.0175417
UGGT1	-0.026182
VCP	0.00207283
VRK2	-0.275415
YWHAH	0.000292508
ZG16	0.0067906
