# Supplementary material for: Proteomic characteristics reveal the signatures and the risks of T1 colorectal cancer metastasis to lymph nodes
Source: eLife journal article supplement (doi:10.7554/elife.82959), 2023-05-09
Supplement: supp [file Figure3-source data3.xlsx]

## Sheet: Sheet1
Figure 3-source data3: Coefficients of 9 protein-markers
Coefficients:
	Estimate Std.	Std. Error	z value	Pr(>|z|)
(Intercept)	-0.48913	0.32686	-1.496	0.13454
ATAD2	5.39884	2.03636	2.651	0.00802	**
CEACAM6	0.10463	0.03277	3.193	0.00141	**
COMMD10	0.64937	0.22014	2.95	0.00318	**
FARS2	1.86262	1.14362	1.629	0.10338
ITPR2	-6.66658	2.68328	-2.484	0.01297	*
RHOT2	-0.74971	0.26846	-2.793	0.00523	**
SERPINB5	0.12021	0.03856	3.118	0.00182	**
SWAP70	-0.78703	0.30518	-2.579	0.00991	**
VRK2	-4.71124	2.01949	-2.333	0.01965	*
Signif. codes: 0 ‘***’ 0.001 ‘**’ 0.01 ‘*’ 0.05 ‘.’ 0.1 ‘ ’ 1
