# Supplementary material for: Proteomic characteristics reveal the signatures and the risks of T1 colorectal cancer metastasis to lymph nodes
Source: eLife journal article supplement (doi:10.7554/elife.82959), 2023-05-09
Supplement: supp [file Figure4-source data1.xlsx]

## Sheet: Sheet1
Figure 4-source data1: Immunohistochemistry (IHC) staining score
Intensity	% of immunostaining	Score (Intensity * % of immunostaining)				BAIAP2			CEACAM6			ZG16						PAAF1			SHMT1			SWAP70			TTC19			VRK2
0 – negative	0: 0%	0: equal expression			LNM	Intensity	%	Score	Intensity	%	Score	Intensity	%	Score			LNM	Intensity	%	Score	Intensity	%	Score	Intensity	%	Score	Intensity	%	Score	Intensity	%	Score
1 – weak	1: 1 to 25%	1 to 4: low expression		19G38754	0	2	2	4	1	4	4	1	3	3		15S33676	0	1	2	2	1	4	4	2	2	4	2	3	6	1	4	4
2 – moderate	2: 26 to 50%	5 to 8: medium expression		17S25394	0	1	3	3	2	4	8	2	2	4		16S09357	0	1	3	3	1	1	1	1	4	4	2	4	8	2	2	4
3 – strong	3: 51 to 75%	9 to 12: high expression		15S30842	0	0	0	0	1	4	4	3	2	6		16S49836	0	1	2	2	3	4	12	2	2	4	3	3	9	2	3	6
	4: > 75%			19G51368	0	1	1	1	2	4	8	2	3	6		17S11583	0	1	3	3	2	3	6	3	2	6	2	3	6	2	3	6
				19G50693	0	2	4	8	1	4	4	0	0	0		17S16705	0	3	2	6	2	3	6	3	4	12	2	2	4	2	2	4
				15S28617	0	3	4	12	2	4	8	1	3	3		17S47700	0	1	3	3	2	4	8	1	4	4	1	2	2	3	3	9
				19S35594	0	1	4	4	1	4	4	1	1	1		18S04516	0	1	2	2	2	2	4	3	2	6	2	2	4	1	3	3
				15S40656	0	0	0	0	1	4	4	1	1	1		S10-16359	0	0	0	0	1	2	2	2	4	8	1	3	3	0	0	0
				19S61571	0	2	3	6	2	4	8	0	0	0		S2011-09959	0	0	0	0	2	4	8	2	4	8	2	4	8	1	3	3
				17G05952	0	1	4	4	1	4	4	0	0	0		S2013-29902	0	1	2	2	3	2	6	2	2	4	2	3	6	0	0	0
				16S16600	0	1	2	2	1	2	2	2	4	8		S2014-21260	0	1	3	3	1	1	1	0	0	0	2	2	4	0	0	0
				19S40085	1	1	2	2	2	4	8	2	4	8		15S22137	1	1	3	3	2	2	4	1	1	1	1	3	3	1	2	2
				18s35577	1	1	4	4	1	4	4	1	2	2		15S39287	1	0	0	0	1	4	4	2	4	8	2	4	8	1	3	3
				S2011-09959	1	1	3	3	3	4	12	1	2	2		16S36062	1	1	3	3	1	4	4	1	4	4	1	2	2	1	3	3
				19G15915	1	3	3	9	1	4	4	2	4	8		17G54020	1	0	0	0	1	2	2	1	2	2	1	3	3	2	2	4
				17S25644	1	1	4	4	2	4	8	3	2	6		17S18883	1	0	0	0	2	2	4	1	2	2	2	3	6	0	0	0
				18S42473	1	2	4	8	2	4	8	1	3	3		19G63297	1	1	3	3	2	4	8	2	3	6	2	4	8	1	2	2
				18S11490	1	2	4	8	1	4	4	1	3	3		19G67557	1	0	0	0	1	2	2	1	2	2	2	3	6	1	2	2
				18s05970	1	0	0	0	1	4	4	1	2	2		19G88374	1	1	3	3	2	3	6	2	4	8	2	4	8	3	3	9
				16S09316	1	2	4	8	2	4	8	0	0	0		19S18486	1	2	3	6	1	2	2	1	4	4	1	4	4	1	3	3
				S2010-31658	1	0	0	0	1	4	4	1	2	2		19S68307	1	0	0	0	1	4	4	3	3	9	2	3	6	1	2	2
																19S70405	1	0	0	0	2	2	4	3	2	6	2	2	4	1	2	2
						ABI1			ITPR2			RHOT2			ATAD2			ISLR
					LNM	Intensity	%	Score	Intensity	%	Score	Intensity	%	Score	Intensity	%	Score	Intensity	%	Score
				15S33676	0	2	4	8	1	4	4	3	4	12	3	1	3	1	3	3
				16S09357	0	1	4	4	2	4	8	2	4	8	0	0	0	1	3	3
				16S49836	0	1	4	4	3	4	12	3	4	12	1	2	2	2	3	6
				17S11583	0	2	4	8	2	4	8	3	3	9	2	1	2	0	0	0
				17S16705	0	2	2	4	2	4	8	2	3	6	2	1	2	1	2	2
				17S47700	0	3	3	9	0	0	0	3	3	9	2	2	4	2	2	4
				18S04516	0	2	2	4	3	2	6	3	2	6	0	0	0	0	0	0
				S10-16359	0	2	4	8	1	2	2	2	4	8	NA	NA	NA	NA	NA	NA
				S2011-09959	0	3	3	9	2	3	6	2	3	6	0	0	0	2	2	4
				S2013-29902	0	2	1	2	2	4	8	2	3	6	1	2	2	2	3	6
				S2014-21260	0	2	3	6	2	2	4	2	3	6	1	1	1	0	0	0
				15S22137	1	1	1	1	1	3	3	2	3	6	1	1	1	1	2	2
				15S39287	1	1	2	2	1	1	1	3	3	12	1	1	1	1	1	1
				16S36062	1	2	3	6	0	0	0	1	3	3	2	2	4	2	3	6
				17G54020	1	2	2	4	1	4	4	2	3	6	2	2	4	1	2	2
				17S18883	1	2	3	6	3	2	6	0	0	0	0	0	0	1	2	2
				19G63297	1	2	2	4	1	4	4	1	2	2	2	2	4	2	3	6
				19G67557	1	1	4	4	2	4	8	2	3	6	3	2	6	1	2	2
				19G88374	1	1	4	4	2	3	6	2	3	6	3	1	3	1	1	1
				19S18486	1	1	4	4	1	2	2	2	2	4	2	2	4	3	4	12
				19S68307	1	0	0	0	2	1	2	1	4	4	3	2	6	2	4	8
				19S70405	1	1	2	2	3	3	9	3	2	6	1	1	1	2	2	4
				19G38754	0	3	4	12	1	2	2	2	4	8	0	0	0	1	2	2
				17S25394	0	1	3	3	1	3	3	2	3	6	0	0	0	1	2	2
				15S30842	0	1	3	3	1	3	3	1	3	3	0	0	0	2	2	4
				19G51368	0	1	3	3	1	3	3	2	3	6	2	3	6	1	4	4
				19G50693	0	1	2	2	1	3	3	2	2	4	1	3	3	0	0	0
				15S28617	0	1	4	4	0	0	0	1	4	4	0	0	0	2	3	6
				19S35594	0	3	1	3	0	0	0	1	4	4	0	0	0	1	3	3
				15S40656	0	1	4	4	1	2	2	1	2	2	0	0	0	0	0	0
				19S61571	0	2	2	4	2	4	8	1	3	3	1	2	2	2	3	6
				17G05952	0	2	3	6	1	2	2	2	4	8	2	2	4	1	3	3
				16S16600	0	2	3	6	2	2	4	1	2	2	0	0	0	2	3	6
				19S40085	1	3	2	6	1	3	3	1	3	3	1	4	4	2	2	4
				18s35577	1	2	2	4	0	0	0	3	3	9	0	0	0	1	3	3
				19G15915	1	2	2	4	1	1	1	2	3	6	1	3	3	3	3	9
				17S25644	1	2	4	8	0	0	0	3	3	9	1	2	2	2	4	8
				18S42473	1	3	3	9	1	3	3	1	4	4	1	4	4	3	2	6
				18S11490	1	1	4	4	1	2	2	2	3	6	0	0	0	2	4	8
				18s05970	1	3	3	9	0	0	0	3	3	9	2	2	4	2	4	8
				16S09316	1	2	3	6	0	0	0	2	3	6	1	2	2	1	2	2
				S2010-31658	1	2	2	4	0	0	0	0	0	0	2	3	6	1	3	3
				21-1891	0	3	4	12	2	3	6	2	4	8	3	2	6	3	3	9
				21-01226	0	3	4	12	0	0	0	2	4	8	1	1	1	1	4	4
				21-0724	0	3	3	9	2	2	4	3	4	12	0	0	0	1	1	1
				20-05069	0	3	2	6	1	2	2	3	2	6	2	3	6	3	2	6
				20-09771	0	3	3	9	2	2	4	3	4	12	2	1	2	2	4	8
